1 **Local biodiversity change reflects interactions among changing abundance, evenness and**  
2 **richness**

3

4 Shane A. Blowes, German Centre for Integrative Biodiversity Research (iDiv) Halle-Jena-  
5 Leipzig, Germany; Department of Computer Science, Martin Luther University Halle-  
6 Wittenberg, Halle (Salle), Germany. [shane.blowes@idiv.de](mailto:shane.blowes@idiv.de)

7

8 Gergana N. Daskalova, School of GeoSciences, University of Edinburgh, Scotland EH9 3FF.  
9 [gndaskalova@gmail.com](mailto:gndaskalova@gmail.com)

10

11 Maria Dornelas, Centre for Biological Diversity, University of St Andrews, KY16 9TH.  
12 [maadd@st-andrews.ac.uk](mailto:maadd@st-andrews.ac.uk)

13

14 Thore Engel, German Centre for Integrative Biodiversity Research (iDiv) Halle-Jena-Leipzig,  
15 Germany; Department of Computer Science, Martin Luther University Halle-Wittenberg, Halle  
16 (Salle), Germany. [thore.engel@idiv.de](mailto:thore.engel@idiv.de)

17

18 Nicholas J. Gotelli, Department of Biology, University of Vermont, Burlington, VT 05405 USA.  
19 [Nicholas.Gotelli@uvm.edu](mailto:Nicholas.Gotelli@uvm.edu)

20

21 Anne E. Magurran, Centre for Biological Diversity, University of St Andrews, KY16 9TH.  
22 [aem1@st-andrews.ac.uk](mailto:aem1@st-andrews.ac.uk)

23

24 Inês S. Martins, Leverhulme Centre for Anthropocene Biodiversity and Department of Biology,  
25 University of York, York YO10 5DD, UK; Centre for Biological Diversity, University of St  
26 Andrews, KY16 9TH. [iism1@st-andrews.ac.uk](mailto:iism1@st-andrews.ac.uk)

27

28 Brian McGill, School of Biology and Ecology and Mitchell Center for Sustainability Solutions,  
29 University of Maine; Orono, ME. [mail@brianmcgill.org](mailto:mail@brianmcgill.org)

30

31 Daniel J. McGlinn, Department of Biology, College of Charleston, Charleston, SC.

32 [danmcglinn@gmail.com](mailto:danmcglinn@gmail.com)

33

34 Alban Sagouis, German Centre for Integrative Biodiversity Research (iDiv) Halle-Jena-Leipzig,  
35 Germany; Department of Computer Science, Martin Luther University Halle-Wittenberg, Halle  
36 (Salle), Germany. [alban.sagouis@idiv.de](mailto:alban.sagouis@idiv.de)

37

38 Hideyasu Shimadzu, Department of Mathematical Sciences, Loughborough University, LE11  
39 3TU, UK; Graduate School of Public Health, Teikyo University, Tokyo, Japan.

40 [H.Shimadzu@lboro.ac.uk](mailto:H.Shimadzu@lboro.ac.uk)

41

42 Sarah R. Supp, Data Analytics Program, Denison University, Granville, OH 43023 USA.

43 [supps@denison.edu](mailto:supps@denison.edu)

44

45 Jonathan M. Chase, German Centre for Integrative Biodiversity Research (iDiv) Halle-Jena-  
46 Leipzig, Germany; Department of Computer Science, Martin Luther University Halle-  
47 Wittenberg, Halle (Salle), Germany. [jonathan.chase@idiv.de](mailto:jonathan.chase@idiv.de)

48 **Running title:** Characterizing multicomponent diversity change

49 **Corresponding author:** Shane Blowes, German Centre for Integrative Biodiversity Research  
50 (iDiv) Halle-Jena-Leipzig, Deutscher Platz 5e, Leipzig 04103, Germany. [shane.blowes@idiv.de](mailto:shane.blowes@idiv.de)  
51 +49 341 9733254.

52 **Open research statement:** All data used in the manuscript are already in the public domain. The  
53 BioTIME database is accessible through the BioTIME website (<http://biotime.st-andrews.ac.uk>)  
54 and a Zenodo repository (<https://zenodo.org/record/1095627>). Perturbed time series were  
55 compiled using the data portal of the Environmental Data Initiative  
56 (<https://portal.edirepository.org/nis/home.jsp>), query as described in the methods; code for  
57 compilation and standardization available at <https://github.com/chase-lab/BioTIMEx>; upon  
58 acceptance, this code will be stored in combination with the code for analyses (see below) in  
59 Zenodo. The 2016 release of the PREDICTS database as used here is available at  
60 <https://data.nhm.ac.uk/dataset/the-2016-release-of-the-predicts-database>. McGill SAD data were  
61 previously archived at: <https://doi.org/10.6084/m9.figshare.6945704>. CESTES database is  
62 available at <https://doi.org/10.25829/idiv.286-21-2695>. Code for all analyses is available at  
63 <https://github.com/sablows/MulticomponentBioChange>; upon acceptance, this code will be  
64 stored (with code for accessing and cleaning the EDI data described above) in Zenodo.

65

66 **Abstract**

67 Biodiversity metrics often integrate data on the presence and abundance of multiple species. Yet  
68 understanding covariation of changes to the numbers of individuals, the evenness of species'  
69 relative abundances, and the total number of species remains limited. Using individual-based  
70 rarefaction curves, we introduce a conceptual framework to understand how expected positive  
71 relationships among changes in abundance, evenness and richness arise, and how they can break  
72 down. We then examined interdependencies between changes in abundance, evenness and  
73 richness in more than 1100 assemblages sampled either through time or across space. As  
74 predicted, richness changes were greatest when abundance and evenness changed in the same  
75 direction, and countervailing changes in abundance and evenness acted to constrain the  
76 magnitude of changes in species richness. Site-to-site changes in abundance, evenness, and  
77 richness were often decoupled, and pairwise relationships between changes in these components  
78 across assemblages were weak. In contrast, changes in species richness and relative abundance  
79 were strongly correlated for assemblages varying through time. Temporal changes in local  
80 biodiversity showed greater inertia and stronger relationships between the component changes  
81 when compared to site-to-site variation. Local variation in assemblage diversity was rarely due to  
82 a passive sample from a more or less static species abundance distribution. Instead, changing  
83 species relative abundances often dominated local variation in diversity. Moreover, how  
84 changing relative abundances combined with changes to total abundance frequently determined  
85 the magnitude of richness changes. Embracing the interdependencies between changing  
86 abundance, evenness and richness can provide new information for better understanding  
87 biodiversity change in the Anthropocene.

88 **Keywords:** biodiversity change, abundance, evenness, species richness, rarefaction

## 89 **Introduction**

90 Measures of biodiversity and its change are frequently used to determine the magnitude,  
91 direction and pace of ecosystem modifications (Diaz et al. 2019). Descriptions of the distribution  
92 and abundance of organisms are central to basic ecological research (Krebs 1972, Andrewartha  
93 & Birch 1984), and biodiversity (as applied to taxonomic or species diversity) is a multifaceted  
94 concept that combines information on the distribution and abundance of multiple species. There  
95 have been numerous such aggregate metrics proposed to quantify different aspects of  
96 biodiversity (e.g., Hill 1973, Gotelli and Colwell 2001, Magurran & McGill 2011, Chao and Jost  
97 2012), most of which depend on sample effort and scale (Rosenzweig 1995, Whittaker et al.  
98 2001, McGill 2011a, Chase & Knight 2013). This inherent complexity poses significant  
99 challenges for quantitative syntheses of temporal and spatial variation in biodiversity.

100

101 Here, we argue that in order to understand biodiversity change, it is critical to look beyond  
102 aggregate metrics in isolation. Specifically, we need to examine how changes in the key  
103 components that lead to aggregate metrics interact and combine with each other. Currently,  
104 different components that underlie biodiversity represent important, but are largely viewed as  
105 independent lines of evidence for contemporary biodiversity change. For example, one body of  
106 work is focused on quantifying total abundances of all species within assemblages, such as  
107 recent work documenting declines of birds (e.g., Rosenberg et al. 2019) and insects (Wagner  
108 2020). A related body of work focuses instead on population-level ‘winners’ and ‘losers’ within  
109 assemblages (McKinney & Lockwood 2000), species with increasing and decreasing trends in  
110 occupancy or abundance (e.g., WWF 2020). However, changes in the means of these metrics do  
111 not capture the variability and nuance in either the assemblage- and population-level abundance

112 trends across space and among taxa (e.g., van Klink et al. 2020, Daskalova et al. 2020a, Leung et  
113 al. 2020). Moreover, trends in total assemblage abundance provide only one window into  
114 potentially complex changes that could be occurring in other components of biodiversity, and  
115 while changes to species relative abundances do influence biodiversity metrics, population-level  
116 trends themselves cannot be used to calculate assemblage-level (i.e., biodiversity) metrics (e.g.,  
117 Dornelas et al. 2019). Even when quantifying the same response metric (i.e., species richness),  
118 syntheses of biodiversity change in space due to differential land use conditions have found  
119 declines of species richness (e.g., Newbold et al. 2015, 2018), whereas analyses of time series  
120 have shown that, on average, species richness increases roughly offset decreases (Dornelas et al.  
121 2014, Blowes et al. 2019), despite often significant modifications to climate and habitat (Antão  
122 et al. 2020a, Daskalova et al. 2020b). Finally, the prediction that human activities likely impact  
123 species relative abundances more frequently than species occurrences (Chapin et al. 2000), has  
124 not resulted in a strong focus on assemblage-level evenness in existing syntheses (but see, e.g.,  
125 Crowder et al. 2010, Zhang et al. 2012, Jones & Magurran 2018). Importantly, changes in all  
126 these components -- abundance, evenness, and richness -- contribute to variation in biodiversity.  
127 Yet little is known about how components are changing in combination within assemblages, and  
128 whether certain combinations act to constrain observed biodiversity change.

129  
130 Species origination (speciation plus colonization) and extinction are the most fundamental  
131 processes for biodiversity dynamics (Storch et al. 2021). These processes combine with  
132 productivity (Currie 1991, Mittelbach et al. 2001), disturbance frequency and intensity (Connell  
133 1978, Miller et al. 2011), historical (Latham & Ricklefs 1993) and biogeographic factors (e.g.,  
134 Kreft et al. 2008), land use modifications (Newbold et al. 2015), and climate change (Antão et al.

135 2020a) to drive variation in biodiversity. In turn, these processes and drivers combine such that  
136 local scale measures of biodiversity estimated from a given (local) sample depends largely on  
137 two components (see e.g., He and Legendre 2002, McGill 2011a). First, the total number of  
138 individuals (Fisher et al. 1943, Preston 1962), whereby fewer individuals are expected to (non-  
139 linearly) lead to fewer species. Second, the total number of species and their relative abundances  
140 within the regional species pool (i.e., the set of all potential colonizing species in a region),  
141 which we refer to as the Species Abundance Distribution (SAD; McGill et al. 2007). Local  
142 samples will have lower species richness when the species pool has relatively few highly  
143 abundant species and many rare species (i.e., less even SADs), compared to samples from a  
144 species pool of the equivalent size with more equitable species abundances. Moreover, variation  
145 or changes in local environmental conditions can alter local patterns of species relative  
146 abundances. Whenever two or more samples across space or time differ in the total number of  
147 individuals, the shape of the SAD, or both, there will be changes in most metrics of biodiversity.  
148 However, changes in abundance and the SAD are not always correlated, and, when decoupled,  
149 the magnitude and direction of change in derived biodiversity metrics can differ considerably.  
150  
151 Variation in the total number of individuals is a long-standing, first-order explanation of  
152 variation in richness (Fisher et al. 1943, Coleman et al. 1982, Srivastava & Lawton 1998, Gaston  
153 2000, Scheiner & Willig 2005, Storch et al. 2018). In the context of species-area relationships,  
154 this has been termed the ‘passive sampling hypothesis’ (Coleman et al. 1982), and as local  
155 assemblages increase in size they are expected to include more species from the regional pool  
156 due to sampling processes alone. Larger (Connor & McCoy 1979) or more productive (Wright  
157 1983) areas are also predicted to have more species driven again by increased numbers of

158 individuals, but in these cases associated with processes other than sampling, such as decreased  
159 likelihood of species extinction with increased population sizes (Preston 1962, Wright 1983,  
160 Srivastava & Lawton 1998), and commonly termed the ‘more individuals hypothesis’ (Srivastava  
161 & Lawton 1998). Anthropogenic drivers can also influence the number of individuals in  
162 assemblages (e.g., via eutrophication, exploitation, harvesting or land clearing), potentially  
163 impacting biodiversity due to changes to the total number of individuals (Newbold et al. 2015,  
164 Blowes et al. 2020). If biodiversity varies primarily via changes in the numbers of individuals,  
165 positive relationships between altered numbers of individuals and species richness changes are  
166 expected. In such cases, however, other metrics of species diversity that control for variation in  
167 numbers of individuals, such as species richness expected for a given number of individuals—  
168 known as rarefied richness—should be relatively unchanged.

169  
170 Changes to the shape of the SAD can drive variation in biodiversity through time or space. For  
171 example, co-occurrence and coexistence of species can be altered by changes to resource  
172 diversity (MacArthur 1965), environmental or habitat heterogeneity (Tilman 1982, Shmida &  
173 Wilson 1985), interspecific interactions (e.g., keystone predation; Paine 1974, Menge et al.  
174 2020), biological invasions (Vilà et al. 2011), and external perturbations (Hughes et al. 2007).  
175 Alterations to any of these features can change biodiversity by changing species’ relative  
176 abundances and the size of the species pool (via species additions or subtractions).  
177 Anthropogenic factors can also favor some species and disfavor others, potentially altering the  
178 relative abundance of species (e.g., due to selective exploitation; Blowes et al. 2020), or the size  
179 of the species pool (e.g., species with large ranges replacing those with small ranges, Newbold et  
180 al. 2018). In such cases, biodiversity change will be characterized by positive relationships



181 between species richness change and changes in metrics sensitive to relative abundance, such as  
182 rarefied richness, evenness and diversity metrics sensitive to species relative abundances.  
183  
184 Changing components of biodiversity can covary in different and informative ways. Yet, to date,  
185 there has been little exploration of this covariation in time or space, nor of the theoretical  
186 linkages. For example, whether total abundances and the evenness of species' relative  
187 abundances change in similar or decoupled ways, and how this influences biodiversity change is  
188 largely unknown. However, syntheses of relationships between different biodiversity metrics,  
189 which can reflect different combinations of component changes, have typically found  
190 relationships to be weak. For example, Stirling and Wilsey (2001) showed that although strong  
191 positive correlations between species richness, diversity and evenness metrics were expected  
192 from a neutral model (Caswell 1976), there was considerable variation in the strength, and even  
193 the sign of the relationships in 323 empirical comparisons. Similarly, Soininen et al. (2012)  
194 examined temporal ( $n = 212$ ) and spatial variation ( $n = 17$ ) in aquatic datasets, and again found  
195 considerable heterogeneity in the relationship between richness and evenness. Using data from  
196 91 assemblages, McGill (2011b) concluded that most biodiversity metrics align with three axes  
197 of empirical variation (total abundance, evenness and richness); components subsequently shown  
198 to be relatively uncorrelated across space for a subset of 37 of the 91 assemblages (Chase et al.  
199 2018). Collectively, these studies suggest that static biodiversity estimates are multidimensional,  
200 and that different metrics can covary or be unrelated.

201  
202 Where ecologists have quantified variation in multiple components of local diversity, the focus  
203 has typically been on averages across assemblages, with each component treated as a separate,

204 independent response. For example, analyses of the local assemblages documented by the  
205 BioTIME database (Dornelas et al. 2018) show that numbers of individuals, species richness, and  
206 dominance (quantified as the relative abundance of the most numerically dominant species, and  
207 conceptually the complement of evenness) are highly variable among datasets, but on average,  
208 have no directional trend (Dornelas et al. 2014, Jones & Magurran 2018, Blowes et al. 2019). On  
209 the other hand, analyses of the PREDICTS database (Hudson et al. 2017) documenting spatial  
210 contrasts between assemblages in more pristine habitats with those in different land use  
211 categories, show that human-altered habitats frequently have fewer species and often fewer  
212 individuals (Newbold et al. 2015, 2020). However, these results describe average changes across  
213 assemblages estimated independently, whereas, as we describe in more detail below, component  
214 changes are unlikely to be completely independent.

215  
216 Here, we first provide a conceptual overview of how changes in the main components underlying  
217 local biodiversity (total abundance, evenness and species richness) can combine using  
218 individual-based rarefaction curves. Using simplified scenarios with contrasting component  
219 changes, we show that the signs (or direction) of changes in total abundance and evenness can  
220 combine to determine the magnitude of expected richness changes, and whether positive  
221 pairwise relationships prevail. We then empirically assess interdependencies between abundance,  
222 evenness and richness changes using compilations of ecological assemblage data. In the face of  
223 natural and anthropogenically-driven environmental variation in time and space, we ask whether  
224 changes in the components of local biodiversity show positive relationships (i.e., change in the  
225 same direction). Or, alternatively, are component changes sufficiently heterogeneous that

226 variation in biodiversity depends on which of the underlying components (numbers of  
227 individuals or the SAD) are changing, and how the different component changes combine?

228

### 229 **Conceptual relationships between changes in total abundance, evenness and richness**

230 Individual-Based Rarefaction (IBR) curves (Hurlbert 1971, Gotelli & Colwell 2001) are well  
231 suited for visualizing conceptual relationships among changes in total abundance, evenness and  
232 species richness (Fig. 1a, Cayuela et al. 2015, Chase et al. 2018, McGlinn et al. 2019). The end  
233 point of the IBR depicts the total number of individuals of all species combined, and variation  
234 between assemblages in where the IBR terminates quantifies changes to the number of  
235 individuals ( $\Delta N$ , Fig. 1a) and species richness ( $\Delta S$ , Fig. 1a). The shape (or curvature) of the IBR  
236 curve reflects species' relative abundances and the size of the species pool (i.e., the SAD). We  
237 use two parts of the curve to characterize changes in the SAD between assemblages. First,  
238 because it is standardized to an equal number of individuals ( $n$ ), changes in rarefied richness,  $\Delta S_n$   
239 (Fig. 1a), reflects changes to species' relative abundances only. Second, we use the numbers  
240 equivalent (or effective number of species) transformation of the Probability of Interspecific  
241 Encounter (PIE, Hurlbert 1971). The PIE is equal to the slope at the base of the rarefaction curve  
242 (Olszewski 2004) and represents a metric of evenness that is relatively insensitive to sample  
243 effort (more even communities have a higher PIE, Fig. 1a). Transformation of the PIE to the  
244 numbers equivalent ( $S_{PIE}$ ) aids comparisons to species richness (i.e.,  $\Delta S$  and  $\Delta S_{PIE}$  have the same  
245 units; Jost 2006).  $S_{PIE}$  is equal to the inverse of Simpson concentration (Jost 2006), and diversity  
246 of order  $q = 2$  (Hill 1973, Jost 2007),  $D = (\sum_{i=1}^S p_i^q)^{1/(1-q)} = \frac{1}{\sum_{i=1}^S p_i^2}$ , where  $S$  is the number of  
247 species and  $p_i$  is the proportion of the assemblage represented by species  $i$ . As a consequence,

248 changes in  $S_{PIE}$  ( $\Delta S_{PIE}$ ) are most strongly influenced by the number of abundant or common  
249 species in assemblages.

250

251 To visualize relationships among changes in total abundance, evenness and richness, we plot  
252 pairwise relationships between changes in four components of the IBR. Specifically, changes in  
253 species richness ( $\Delta S$ ) and total abundance ( $\Delta N$ ; Fig. 1b), and species richness and the two metrics  
254 sensitive to changes in relative abundance – rarefied richness,  $\Delta S_n$  (Fig. 1c), and  $\Delta S_{PIE}$ , which we  
255 refer to as evenness (Fig. 1d). Changing components with positive relationships (i.e., the same  
256 sign) fall into the lower left and upper right quadrants, whereas assemblage changes that fall into  
257 the upper left or lower right quadrants of Figs. 1b, c, d reflect a negative relationship between the  
258 respective components.

259

260 Altered numbers of individuals, but no change to the SAD, can underpin differences in diversity  
261 between assemblages. Changes only to the number of individuals being passively sampled from  
262 the same underlying SAD (Fig. 2a) result in  $\Delta S$  and  $\Delta N$  being positively related with the same  
263 sign (Fig. 2g), whereas  $\Delta S_n$  (Fig. 2h) and  $\Delta S_{PIE}$  (Figs. 2i) will be approximately zero (and have a  
264 weak or no relationship with  $\Delta S$ ). This has been variously referred to in the literature as a  
265 sampling effect, the rarefaction effect, and the passive sampling hypothesis (Coleman et al. 1982,  
266 Gotelli & Cowell 2001, Palmer et al. 2000).

267

268 Changes in species richness ( $\Delta S$ ) can also be solely associated with changes to relative  
269 abundance (i.e.,  $\Delta N \approx 0$ ), which weakens or removes the expectation for a positive relationship  
270 between changes in richness and total abundance. For example, changes in species richness can

271 be associated with SAD changes due, for e.g., to increased numbers of common species,  
272 increased evenness (He & Legendre 2002), or increases to the size of the species pool (Fig. 2b),  
273 which results in a positive relationship between  $\Delta S$  and  $\Delta S_{\text{PIE}}$  (Figure 2i). Finally, if total  
274 abundance and relative abundance change in the same direction (e.g., more individuals and  
275 increased evenness, Fig. 2c), then positive pairwise relationships are expected between changes  
276 in abundance, evenness and richness (Figs. 2g, h, i).

277

278 In contrast, even if numbers of individuals increase ( $\Delta N > 0$ ), expected gains in species richness  
279 can be constrained by decreased evenness. For example, opposing changes in total abundance  
280 and evenness can potentially result in no change to species richness (Fig. 2d), and no relationship  
281 between  $\Delta S$  and  $\Delta N$  (Fig. 2g). Or, if changes to the SAD are sufficiently strong, they can offset  
282 any expected gains due to more individuals (Fig. 2e), and result in a negative relationship  
283 between  $\Delta S$  and  $\Delta N$  (Fig. 2g). Alternatively, opposing changes to total numbers of individuals  
284 and evenness could result in a positive relationship between  $\Delta S$  and  $\Delta N$  if, for example, the  
285 effects of more individuals on species richness outweighs that of decreased evenness (Figure 2f).

286

287 These simplified scenarios illustrate the potential for interdependencies between component  
288 changes. In particular, they show that the signs of changes in total abundance and evenness (i.e.,  
289  $\Delta N$  and  $\Delta S_{\text{PIE}}$ ) can strongly influence the magnitude of richness changes, and whether expected  
290 positive relationships between changes in abundance, evenness and richness are found.  $\Delta N$  is  
291 associated with the IBR curve stretching or contracting along the x-axis, and  $\Delta S_{\text{PIE}}$  characterizes  
292 changes that flex the curve up or down from the base along the y-axis (Olszewski 2004). When  
293  $\Delta N$  and  $\Delta S_{\text{PIE}}$  have the same sign, assemblages are expected to fall into the lower left and upper

294 right quadrants of Figs. 2g-i (i.e., component changes with the same sign and positive pairwise  
295 relationships). In contrast, when  $\Delta N$  and  $\Delta S_{\text{PIE}}$  have different signs, they can have countervailing  
296 effects that constrain richness changes, the strength of their pairwise relationships with  $\Delta S$  will  
297 be diminished and potentially reversed, and the likelihood of assemblages falling into the upper  
298 left and lower right quadrants of Figs. 2g-i increases (i.e., opposing signs and negative pairwise  
299 relationships).

300

### 301 **Empirical relationships among total abundance, evenness and richness**

302 Next, we evaluate empirical relationships by fitting models that allow for correlations between  
303 component changes to data from 1125 assemblages. Our goal for the empirical analyses was to  
304 examine relationships between changing components in temporal and spatial contexts across a  
305 broad range of environmental conditions. We compiled data documenting either temporal or  
306 spatial variation of assemblage composition in one of either naturally-varying or perturbed  
307 environmental conditions. Temporal variation quantified rates of change (i.e., per year) for each  
308 component for an assemblage at a single location through time. Analyses of spatial variation  
309 quantified component changes between sites in different land use categories in perturbed  
310 environments, or between random pairs of sites in the naturally-varying environment.

311

312 Based on our conceptual overview, we expect pairwise relationships between abundance,  
313 evenness and richness changes to be generally positive. Changes in species richness are also  
314 expected to be largest for assemblages where all pairwise relationships are positive. In contrast,  
315 opposing changes in total abundance and evenness (i.e.,  $\Delta N$  and  $\Delta S_{\text{PIE}}$  have different signs) are  
316 expected to constrain changes in species richness. Additionally, if local diversity changes are

317 dominated by altered total abundances and species richness, strong positive relationships  
318 between  $\Delta S$  and  $\Delta N$ , but weaker relationships between  $\Delta S$  and  $\Delta S_n$ , and  $\Delta S$  and  $\Delta S_{PIE}$  should  
319 emerge across assemblages. Alternatively, strong relationships between either  $\Delta S$  and  $\Delta S_n$  and/or  
320  $\Delta S$  and  $\Delta S_{PIE}$ , accompanied by a weaker relationship between  $\Delta S$  and  $\Delta N$ , would indicate that  
321 changes to the SAD are the dominant component of local assemblage change.

322

### 323 *Temporal comparisons: natural environmental variation*

324 Temporal changes in natural assemblages at the local scale were quantified using the BioTIME  
325 database (Dornelas et al. 2018). Annual rates of change (change per year) for each metric were  
326 estimated with models fit to data that documents over 45 thousand species in time series with an  
327 average duration of 13 years. Taxonomic groups in our analysis came from surveys in marine,  
328 freshwater and terrestrial ecosystems, and included plants (and other producers), invertebrates,  
329 fish, amphibians, reptiles, birds, and mammals, as well as several surveys that collected data  
330 from multiple taxa. Here, we only used time series that had numerical abundance data available  
331 (i.e., studies that recorded counts of the number of individuals for each species in an  
332 assemblage), and our analysis included 288 studies. Locations sampled in the BioTIME database  
333 document places with varying degrees of anthropogenic environmental change, but do not  
334 include manipulated assemblages or before-after-control-impact studies (Dornelas et al. 2018).  
335 Accordingly, we contrast the environmental variation sampled by BioTIME with assemblage  
336 time series that experienced documented perturbations (see *Temporal comparisons: experimental*  
337 *or natural perturbations*).

338

339 To quantify changes at the local scale within BioTIME, studies with large extents were broken  
340 up into smaller cell-level time series, while still maintaining the integrity of individual studies  
341 (i.e., different studies were not combined, even when samples were collected in the same grid  
342 cell). We used sample-based rarefaction (Gotelli & Colwell 2001) to standardize the number of  
343 samples per year for each time series (see Blowes et al. 2019 for details). For the calculation of  
344 rarefied richness ( $S_n$ ), the minimum total number of individuals was determined for each time  
345 series, and set as the target  $n$  for which expected richness was calculated; cell-level time series  
346 where  $n < 5$  were discarded. This process resulted in 42,604 cell-level time series from the 288  
347 studies, and we focus on the study-level estimates of change in our results and discussion.

348

#### 349 *Temporal comparisons: experimental or natural perturbations*

350 To complement the environmental variation sampled by the BioTIME database, we searched for  
351 time series data with either experimental or natural perturbations. Specifically, we queried the  
352 U.S. LTER network using the Data Portal of the Environmental Data Initiative  
353 (<https://portal.edirepository.org/nis/home.jsp>) with the search terms ‘experiment’ and ‘time’ and  
354 ‘abundance’. Records returned were checked to confirm that samples documented assemblages  
355 of similar species collected with the same methodology, and following data standardization (i.e.,  
356 minimum of five individuals per sample, and standardization of sample effort through time), our  
357 analysis included 11 studies (see Appendix S1: *Temporal comparisons: experimental or natural*  
358 *perturbations* for references), and annual rates of change (i.e., per year) were estimated for 63  
359 study-treatment combinations; rates of change for all treatments (including controls) were  
360 quantified in our analyses. Natural and experimental treatments included changes due to



361 warming, eutrophication, fire, grazing, restoration, severe storms or other disturbances, and kelp  
362 removal. Taxonomic groups included algae, plants, invertebrates, fish, birds, and mammals.

363

364 *Spatial comparisons: natural environmental variation*

365 We combined two existing compilations of data to examine spatial patterns of biodiversity  
366 change in relatively natural environmental contexts. The CESTES database (Jeliazkov et al.  
367 2019) contains assemblage data from studies that sampled species at multiple sites (it also  
368 includes information on traits and environment that we do not use here); we removed studies  
369 with explicit human impacts identified as an environmental feature, and our analysis included 19  
370 studies that sampled terrestrial, freshwater and marine assemblages from a number of taxonomic  
371 groups (birds, plants, insects, macroinvertebrates, fishes and mammals). McGill (2011b)  
372 compiled datasets with two or more local assemblages containing species abundance data; we  
373 removed studies documenting disturbances and other perturbations, resulting in 32 studies being  
374 retained. From the combined 51 studies, those with many sites were randomly subsampled down  
375 to ten sites so that they did not dominate the results. Within each study, an arbitrary site was  
376 assigned as the ‘reference’ site, and change was quantified between every site and the reference  
377 within studies; our analysis included a total of 356 spatial comparisons.

378

379 *Spatial comparisons: anthropogenic perturbations*

380 To quantify spatial differences in biodiversity due to anthropogenic land use, we used the  
381 PREDICTS database (Hudson et al. 2017). We used the 2016 release of the database  
382 (downloaded from <https://data.nhm.ac.uk/dataset/the-2016-release-of-the-predicts-database> on  
383 10<sup>th</sup> July 2020). We limited our analyses to studies with abundance data for individuals, and

384 those with known land use categories (primary vegetation, mature secondary vegetation,  
385 intermediate secondary vegetation, plantation forest, cropland, pasture, and urban); studies where  
386 land use was not recorded were omitted. This resulted in 237 combinations of source ID and  
387 study (some sources had multiple studies, denoted SS in the database), and 418 estimates of  
388 change relative to the reference land use (primary vegetation) category.

389

### 390 *Statistical models*

391 To estimate changes in the different metrics whilst accounting for expected correlations between  
392 them, we fit multivariate multilevel models to the data. Similar to the way univariate multilevel  
393 (also called hierarchical or mixed-effects) models fit to a single response can allow varying (also  
394 called random) intercepts and slopes to be correlated, this approach estimates changes in all  
395 components simultaneously whilst allowing for (and estimating) correlations between them.  
396 Response distributions for all metrics were chosen to ensure changes were estimated on similar  
397 measurement scales, and because all metrics take only positive values, log response scales were  
398 used for all components.

399

400 For the *Temporal comparisons: natural environmental variation* data, total abundance ( $N$ ) was  
401 fit with a model that assumed a lognormal distribution and identity link function, and Poisson  
402 distributions with log link functions were fit to  $S_n$ ,  $S_{PIE}$  and  $S$ ; Poisson distributions were chosen  
403 for  $S_n$  and  $S_{PIE}$  values rounded to integers based on visual assessments that showed lognormal  
404 models fit to raw  $S_n$  and  $S_{PIE}$  values greatly underpredicted the density of ones in the data. For the  
405 *Temporal comparisons: experimental or natural perturbations* data,  $S$  was no longer an integer  
406 value after standardizing sampling effort, and all metrics were fit with models that assumed

407 lognormal distributions and identity link functions. Both spatial data sets were fit with models  
408 that assumed lognormal distributions and identity link functions for total abundance ( $N$ ), rarefied  
409 richness ( $S_n$ ) and evenness ( $S_{PIE}$ ), and a Poisson distribution and log-link function for species  
410 richness ( $S$ ).

411

412 The *Temporal comparisons: natural environmental variation* models included non-varying  
413 intercepts and slopes for year, and varying intercepts and slopes for studies and cells for all  
414 responses. To allow for correlations between changes in the different responses, varying study-  
415 and cell-level parameters for all responses were drawn from a single multivariate normal  
416 distribution for each level (i.e., one for studies, one for cells; see Appendix S1: *Temporal*  
417 *comparisons: natural environmental variation* for equations). The models fit to the *Temporal*  
418 *comparisons: experimental or natural perturbations* data similarly included non-varying  
419 intercepts and slopes for year, and had varying intercepts for study, site and block fitted  
420 separately for each response. For these data, correlations between changes in the different  
421 responses were modeled by drawing varying intercepts and slopes for each combination of  
422 treatment and study for all responses from a single multivariate normal distribution (see  
423 Appendix S1: *Temporal comparisons: experimental or natural perturbations* for equations).

424

425 The models fit to the *Spatial comparisons: natural environmental variation* data included non-  
426 varying intercepts for data source (i.e., CESTES and McGill). Correlations between the different  
427 responses were modeled by assuming varying intercepts and slopes (representing the reference  
428 site and departures for all other sites from the reference, respectively) for each study and  
429 response came from a single multivariate normal distribution; over-dispersion in the richness

430 response was modeled using an observation-level varying intercept (see Appendix S1: *Spatial*  
431 *comparisons: natural environmental variation* for equations). Models fit to the *Spatial*  
432 *comparisons: anthropogenic perturbations* data included non-varying intercepts and slopes  
433 (representing the reference [primary vegetation] category and departures from the reference for  
434 each land use category, respectively), and varying intercepts for sites and blocks were modeled  
435 separately for each response. Correlations between changes in the different responses were  
436 modeled by assuming that varying intercepts and slopes (as per the non-varying intercepts and  
437 slopes) for each combination of source and study and each response came from a single  
438 multivariate normal distribution (see Appendix S1: *Spatial comparisons: anthropogenic*  
439 *perturbations* for equations).

440

441 All statistical models were estimated using the Hamiltonian Monte Carlo (HMC) sampler Stan  
442 (Carpenter et al. 2017), and coded using the ‘brms’ package (Burkner 2017). Details of all model  
443 specifications, and the iterations and warmup periods are provided in the Appendix, as are the  
444 priors (which were weakly regularizing). Visual inspection of the HMC chains and model  
445 diagnostics ( $R_{hat} < 1.05$ ) showed good mixing of chains and convergence, and model adequacy  
446 assessed visually using posterior predictive checks showed that the models were able to make  
447 predictions similar to the empirical data (see Appendix Figure: S1-4). Code for all analyses is  
448 available at <https://github.com/sablowes/MulticomponentBioChange>, and will be archived  
449 following publication.

450

451 **Results**

452 Temporal changes in perturbed environments had the highest percentage of assemblages with at  
453 least one component trend ( $\Delta N$ ,  $\Delta S_n$ ,  $\Delta S_{PIE}$ , or  $\Delta S$ ) that differed from zero (44%), followed by  
454 spatial comparisons across land use categories (29%), temporal changes (21%) and spatial  
455 comparisons in naturally varying environments (12%). Component changes that differed from  
456 zero showed broadly similar patterns across datasets, with one exception: trends differing from  
457 zero for multiple components were less common for spatial comparisons between assemblages in  
458 naturally varying environments (Appendix S1: Figure S5).

459  
460 Pairwise relationships between changing components were typically positive (i.e., had the same  
461 sign), though exceptions to this general pattern were found for all data sources (Figure 3). For  
462 assemblages where  $\Delta N$  and  $\Delta S_{PIE}$  had the same sign (though not necessarily differing statistically  
463 from zero), richness changes were typically larger in magnitude (Figure 3). In contrast,  
464 assemblages where  $\Delta N$  and  $\Delta S_{PIE}$  had opposing signs typically exhibited changes in richness that  
465 were smaller in magnitude (Figure 3). This tendency for countervailing changes in abundance  
466 and evenness to constrain richness changes was most apparent for spatial comparisons between  
467 different land use categories (Figure 3j-l), and there was a high proportion of assemblages that  
468 were growing in size ( $\Delta N > 0$ ) but with declining species richness ( $\Delta S < 0$ ; Figure 3j), associated  
469 with declining evenness ( $\Delta S_{PIE} < 0$ ).

470  
471 The strongest relationships were found for components changing through time, and relationships  
472 between richness and changes in the SAD -- rarefied richness (Figs. 3b, e) and evenness (Figs.  
473 3c, f; Figs. 4a, b) -- were stronger than those between changes in richness and total abundance  
474 (Figs. 3a, c; Figs. 4a, b). Spatial comparisons had generally weak relationships overall. No strong

475 relationships between changing components emerged for comparisons in natural environments  
476 (Figs. 3g-i; Fig. 4c), and only weakly positive relationships between changes in abundance,  
477 evenness and richness were found in comparisons between primary vegetation and different land  
478 use categories (Figure 3j-l, Figure 4d).

479  
480 Temporal changes in naturally varying assemblages were roughly centered on zero for all  
481 metrics (Figure 3a-c). Across assemblages, altered numbers of individuals and species richness  
482 changes had a moderately positive relationship (Figure 4a), weakened predominantly by  
483 assemblages that had opposing abundance and evenness relationships (Figure 3a). In contrast,  
484 relationships between changes in species richness and rarefied richness, and between richness  
485 changes and evenness changes were strong (Figure 4a). Assemblages in perturbed environments  
486 had slightly positive temporal trends on average in all components (Figure 3d-f). Across  
487 assemblages,  $\Delta S$  and  $\Delta N$  (Figure 3d, 4b) and  $\Delta S$  and  $\Delta S_{PIE}$  (Figure 3f, 4b) had relatively weak  
488 positive relationships, whereas  $\Delta S$  and  $\Delta S_n$  (Figure 3e, 4b) showed a strong positive relationship.

489  
490 Spatial comparisons in naturally varying environments exhibited highly heterogeneous patterns  
491 of change centered around zero for all metrics (Figure 3g-i). Decoupled component changes  
492 meant that relationships between them were generally absent or weak across assemblages (Figure  
493 4c). Spatial comparisons between assemblages in primary vegetation versus those in different  
494 land use categories were also highly heterogeneous, though there were typically fewer  
495 individuals, less even assemblages and fewer species relative to primary vegetation (Figure 3j-l).  
496 Across assemblages, land use change was typically associated with relatively weak positive  
497 relationships between changes in the components of local diversity (Figure 4d).

498

499 **Discussion**

500 Our conceptual overview using individual-based rarefaction curves clearly shows how the  
501 expectation of positive pairwise relationships between changes in abundance, evenness and  
502 richness arises. If curves stretch or contract, we expect positive relationships between changes in  
503 total abundance and richness. Similarly, if curves flex upwards or downwards, positive  
504 relationships between changes in evenness and richness are expected. Rarefaction curves also  
505 show how contrasting signs of changes in abundance and evenness can strongly determine the  
506 magnitude of richness changes, and determine whether positive relationships between changes in  
507 richness and the other components (abundance and evenness) are likely. Both these predictions  
508 were generally well supported by our empirical analyses. Relationships between changes in  
509 abundance, evenness and richness were generally positive, and richness changes were typically  
510 greater for assemblages with strictly positive pairwise relationships. Countervailing changes in  
511 total abundance and evenness, where found, often constrained the magnitude of changes in  
512 species richness, and acted to weaken relationships between  $\Delta N$  and  $\Delta S$ , and  $\Delta S_{PIE}$  and  $\Delta S$ .  
513 Spatial comparisons had the most heterogeneous relationships between changes in abundance,  
514 evenness, and richness, and in relatively natural environments changes were sufficiently  
515 decoupled that no strong relationships emerged across assemblages. In contrast, strong positive  
516 correlations between temporal changes in species richness ( $\Delta S$ ) and changes in metrics  
517 associated with altered SADs ( $\Delta S_n$ ,  $\Delta S_{PIE}$ ) emerged across assemblages. These temporal results  
518 show strong support for the prediction that variation in relative abundances can dominate local  
519 variation in biodiversity (Chapin et al. 2000), even when human impacts are less direct.

520

521 *Variation in assemblage size does not dominate local diversity change*

522 Overall, only ~2% of assemblages in this study (22 of 1125) had changes consistent with a  
523 strong ‘sampling’ effect on changes in species richness (i.e.,  $\Delta N$  &  $\Delta S$  having the same sign, and  
524 being the only changes different from zero). This finding complements existing evidence  
525 showing that despite many tests, empirical evidence for the more-individuals hypothesis  
526 (Srivastava & Lawton 1998) remains equivocal (Storch et al 2018, Vagle & McCain 2020).  
527 While both (species-level) population variability and variation associated with sampling (Vagle  
528 & McCain 2020) likely contribute to the weak response of species richness to variation in the  
529 total number of individuals, our results are broadly consistent with previous syntheses showing  
530 that broad-scale spatial variation in richness was rarely driven simply by variation in the numbers  
531 of individuals (Currie et al. 2004, Storch et al 2018). Our results indicate that variation in local  
532 diversity, through time or from site-to-site, is not due to changes in assemblage size passively  
533 sampling more or less from a static SAD. Instead, we show that variation in local biodiversity  
534 can be strongly influenced by changes to species’ relative abundances. These changes can be  
535 occurring at multiple scales (Hillebrand et al. 2008, Blowes et al. 2020), and could reflect altered  
536 local environmental conditions (e.g., altered resource or habitat availability and diversity,  
537 eutrophication, local harvest or exploitation), or changes at broader scales that alter the species  
538 pool (via species additions or subtractions).

539

540 Our general result showing that variation in the total abundance of an assemblage through time  
541 or space is often decoupled from changes in metrics of biodiversity such as species richness also  
542 cautions against making “apples to oranges” comparisons in the context of quantifying  
543 biodiversity change. For example, some estimates of change are based on either population-level  
544 abundance (e.g., Living Planet Index, WWF 2020), or assemblage-level abundance (e.g., insect



545 declines; Wagner 2000, van Klink et al. 2020), whereas other change estimates are based on  
546 patterns of the number or identity of species present (e.g., Dornelas et al. 2014, Newbold et al.  
547 2015). Our results show that assuming abundance and richness changes are strongly correlated  
548 will often be an oversimplification. Moreover, the importance of altered relative abundances for  
549 local biodiversity variation means that biodiversity change estimates will frequently depend on  
550 whether changes in species relative abundances influence the metrics used (see e.g., Antão et al.  
551 2020b).

552

553 *Contrasting component relationships between temporal changes versus spatial comparisons of*  
554 *biodiversity*

555 Relationships between changing components of biodiversity showed strikingly different patterns  
556 between temporal changes and spatial comparisons. Moreover, these differences were generally  
557 greater than those found between naturally-varying and perturbed assemblages, for either  
558 temporal changes or spatial comparisons.

559

560 Pairwise relationships between changes in abundance, evenness and richness were typically  
561 weak for spatial comparisons. Decoupling was greatest, and pairwise relationships weakest, for  
562 changes between sites experiencing relatively natural environmental variation. However, given  
563 our simple conceptual framework shows that some degree of interdependence cannot be avoided,  
564 we caution against overinterpreting the relative independence of these component changes, and  
565 further analyses examining component change relationships along continuous spatial gradients  
566 are warranted. Indeed, evenness and richness are never numerically independent (Jost 2010), and  
567 the weak overall relationship between changes in richness and evenness for these data was in

568 part due to assemblages with countervailing changes in abundance and evenness. Most  
569 importantly, these highly variable component changes further emphasize the need for a holistic  
570 approach to quantifying biodiversity change (Chase et al. 2018, Avolio et al. 2021).  
571  
572 Our prediction that the signs of changes in abundance and evenness can strongly determine the  
573 magnitude of richness changes was most evident in the spatial contrasts between primary  
574 vegetation and other land use categories (Newbold et al. 2015, 2020). Assemblages with the  
575 greatest declines in abundance and evenness had the greatest richness declines. In contrast, when  
576 abundance and evenness changes had opposing signs, richness changes were tempered. Indeed,  
577 countervailing abundance and evenness changes were frequently associated with components  
578 other than species richness (i.e.,  $\Delta N$ ,  $\Delta S_n$ , and/or  $\Delta S_{PIE}$ ) having a trend that differed from zero  
579 across all data sources (Appendix S1: Table S1). This highlights that even apparently decoupled  
580 or weakly correlated component changes have interdependencies that can remain important  
581 determinants of observed changes.  
582  
583 In contrast to assemblage change between sites, there was strong coupling between species  
584 richness and SAD changes through time. In particular, the strength of the relationship between  
585  $\Delta S_n$  and  $\Delta S$  resulted in estimates of change being similar for most assemblage time series in  
586 relatively natural environments (Figure 3b). In some cases, this occurred despite countervailing  
587 changes in total abundance and evenness (Figure 3a, b). For assemblages where abundance and  
588 evenness changed in the same direction, similar estimates of  $\Delta S_n$  and  $\Delta S$  indicate that abundance  
589 changes were occurring along a relatively flat region of the individual-based rarefaction curve.  
590 This shows that changes to the total number of individuals need not strongly influence species

591 richness, even where signs are the same and they have a positive relationship. The strong  
592 association between richness changes and altered relative abundances has important implications  
593 for examining causes and/or consequences of biodiversity change (Hillebrand et al. 2008,  
594 Crowder et al. 2010). Even where the expected positive relationships between abundance,  
595 evenness and richness are found, we can more fully understand assemblage changes when all  
596 component changes are examined simultaneously.

597

598 While both approaches, time series and spatial comparisons (or space-for-time substitutions),  
599 have contributed to our understanding of biodiversity change, the relative merits of each for our  
600 understanding of ecological dynamics has not been discussed much (Adler et al. 2020). The  
601 largely decoupled component changes found here for spatial comparisons suggest that too much  
602 focus on average changes across assemblages, such as those in total abundance or in species  
603 richness, risks masking highly heterogeneous changes occurring within assemblages in multiple  
604 components. Moreover, decoupled, heterogeneous component changes complicate using spatial  
605 comparisons to infer temporal changes. The smaller effect sizes found here for time series  
606 indicates greater inertia compared to site-to-site variation. More generally, the strong role of  
607 changes to the SAD for variation in local biodiversity suggests that deepening our understanding  
608 of altered patterns of relative abundance across scales represents an important direction for future  
609 theoretical and empirical work. Here our focus has been on numerical relationships between  
610 component changes, and using process-based models (e.g., Thompson et al. 2020) to examine  
611 how altered metacommunity dynamics impact patterns of relative abundance across scales could  
612 help our understanding how different processes impact component relationships. Similarly,  
613 empirical studies could ask whether local environmental changes are affecting evenness, or if

614 changes occurring at broader spatial scales are impacting the size of species pool and the  
615 regional SAD?

616

### 617 *Conclusions*

618 We found strong correlations between changes in the SAD and species richness changes through  
619 time, whereas relationships between abundance and richness changes for both temporal and  
620 spatial diversity variation were generally weak. Our findings confirm that altered species relative  
621 abundances, and/or changes to the size of the species pool, often strongly influence local  
622 diversity change (Chapin et al. 2010), even where human impacts are less direct. However, our  
623 results also reinforce cautions against examining changes to any one component of biodiversity  
624 change in isolation (e.g., Wilsey et al. 2005, Chase et al. 2018, Avolio et al. 2021).

625

626 To be most useful, quantifying (co)variation in the different components of biodiversity needs to  
627 be done coherently. Individual-based rarefaction curves and associated metrics can provide an  
628 intuitive and illustrative characterization of relationships among changing components of local  
629 biodiversity. Whilst ecologists are increasingly looking beyond species richness to quantify  
630 biodiversity change (e.g., Dornelas et al. 2014, Hillebrand et al. 2018), different components of  
631 biodiversity and its change within assemblages are most often analyzed independently, and  
632 frequently with metrics lacking conceptual unity. Conceptually and empirically, our results  
633 emphasize that changes to the most frequently quantified aspects of biodiversity, including  
634 changes to the numbers of individuals, and the relative abundance and total number of species  
635 are highly interdependent. Examining how within-assemblage component changes covary with  
636 potential drivers could reveal insights masked by independent aggregate estimates of change

637 across assemblages, and provide new information for understanding biodiversity change in the  
638 Anthropocene.

639

#### 640 **Acknowledgements**

641 SAB thanks the Biodiversity Synthesis group at iDiv for constructive feedback at various stages  
642 of the project. SAB, TE, AS, and JMC were supported by the German Centre for Integrative  
643 Biodiversity Research (iDiv) Halle-Jena-Leipzig, funded by the German Research Foundation  
644 (FZT 118).

645

#### 646 **References**

647 Antão, L.H., Bates, A.E., Blowes, S.A., Waldock, C., Supp, S.R., Magurran, A.E., Dornelas, M.,  
648 Schipper, A.M., 2020a. Temperature-related biodiversity change across temperate marine and  
649 terrestrial systems. *Nature ecology & evolution* 4, 927–933.

650 Antão, L.H., Pöyry, J., Leinonen, R., Roslin, T., 2020b. Contrasting latitudinal patterns in  
651 diversity and stability in a high-latitude species-rich moth community. *Global Ecology and*  
652 *Biogeography* 29, 896–907.

653 Avolio, M.L., Komatsu, K.J., Collins, S.L., Grman, E., Koerner, S.E., Tredennick, A.T., Wilcox,  
654 K.R., Baer, S., Boughton, E.H., Britton, A.J., 2021. Determinants of community  
655 compositional change are equally affected by global change. *Ecology Letters* 24, 1892–1904.

656 Blowes, S.A., Chase, J.M., Di Franco, A., Frid, O., Gotelli, N.J., Guidetti, P., Knight, T.M., May,  
657 F., McGlinn, D.J., Micheli, F., 2020. Mediterranean marine protected areas have higher  
658 biodiversity via increased evenness, not abundance. *Journal of Applied Ecology* 57, 578–589.

- 659 Blowes, S.A., Supp, S.R., Antão, L.H., Bates, A., Bruelheide, H., Chase, J.M., Moyes, F.,  
660 Magurran, A., McGill, B., Myers-Smith, I.H., Winter, M., Bjorkman, A.D., Bowler, D.E.,  
661 Byrnes, J.E., Gonzalez, A., Hines, J., Isbell, F., Jones, H.P., Navarro, L.M., Thompson, P.L.,  
662 Vellend, M., Waldock, C., Dornelas, M., 2019. The geography of biodiversity change in  
663 marine and terrestrial assemblages. *Science* 366, 339–345.
- 664 Bolker, B.M., 2008. *Ecological models and data in R*. Princeton University Press.
- 665 Bürkner, P.-C., 2017. brms: An R package for Bayesian multilevel models using Stan. *Journal of*  
666 *Statistical Software* 80, 1–28.
- 667 Carpenter, B., Gelman, A., Hoffman, M.D., Lee, D., Goodrich, B., Betancourt, M., Brubaker,  
668 M., Guo, J., Li, P., Riddell, A., 2017. Stan: A probabilistic programming language. *Journal of*  
669 *Statistical Software* 76.
- 670 Caswell, H., 1976. Community structure: a neutral model analysis. *Ecological monographs* 46,  
671 327–354.
- 672 Cayuela, L., Gotelli, N.J., Colwell, R.K., 2015. Ecological and biogeographic null hypotheses for  
673 comparing rarefaction curves. *Ecological Monographs* 85, 437–455.
- 674 Chao, A., Gotelli, N.J., Hsieh, T.C., Sander, E.L., Ma, K.H., Colwell, R.K., Ellison, A.M., n.d.  
675 Rarefaction and extrapolation with Hill numbers: a framework for sampling and estimation in  
676 species diversity studies. *Ecology* 84, 45–67.
- 677 Chao, A., Jost, L., 2012. Coverage-based rarefaction and extrapolation: standardizing samples by  
678 completeness rather than size. *Ecology* 93, 2533–2547.
- 679 Chapin Iii, F.S., Zavaleta, E.S., Eviner, V.T., Naylor, R.L., Vitousek, P.M., Reynolds, H.L.,  
680 Hooper, D.U., Lavorel, S., Sala, O.E., Hobbie, S.E., 2000. Consequences of changing  
681 biodiversity. *Nature* 405, 234–242.

- 682 Chase, J.M., Blowes, S.A., Knight, T.M., Gerstner, K., May, F., 2020. Ecosystem decay  
683 exacerbates biodiversity loss with habitat loss. *Nature* 584, 238–243.
- 684 Chase, J.M., Knight, T.M., 2013. Scale-dependent effect sizes of ecological drivers on  
685 biodiversity: why standardised sampling is not enough. *Ecol Lett* 16, 17–26.
- 686 Chase, J.M., McGill, B.J., McGlinn, D.J., May, F., Blowes, S.A., Xiao, X., Knight, T.M.,  
687 Purschke, O., Gotelli, N.J., 2018. Embracing scale-dependence to achieve a deeper  
688 understanding of biodiversity and its change across communities. *Ecol Lett* 21, 1737–1751.
- 689 Chase, J.M., McGill, B.J., Thompson, P.L., Antão, L.H., Bates, A.E., Blowes, S.A., Dornelas,  
690 M., Gonzalez, A., Magurran, A.E., Supp, S.R., Winter, M., Bjorkman, A.D., Bruelheide, H.,  
691 Byrnes, J.E., Sarmiento Cabral, J., Elahi, R., Gomez, C., Guzman, H.M., Isbell, F., Myers-  
692 Smith, I.H., Jones, H.P., Hines, J., Vellend, M., Waldock, C., O’Connor, M., 2019. Species  
693 richness change across spatial scales. *Oikos* 1–13.
- 694 Coleman, B.D., Mares, M.A., Willig, M.R., Hsieh, Y.-H., 1982. Randomness, area, and species  
695 richness. *Ecology* 63, 1121–1133.
- 696 Connell, J.H., 1978. Diversity in tropical rain forests and coral reefs. *Science* 199, 1302–1310.
- 697 Connor, E.F., McCoy, E.D., 1979. The statistics and biology of the species-area relationship. *The*  
698 *American Naturalist* 113, 791–833.
- 699 Crowder, D.W., Northfield, T.D., Strand, M.R., Snyder, W.E., 2010. Organic agriculture  
700 promotes evenness and natural pest control. *Nature* 466, 109–112.
- 701 Currie, D.J., 1991. Energy and large-scale patterns of animal-and plant-species richness. *Am Nat*  
702 27–49.

703 Currie, D.J., Mittelbach, G.G., Cornell, H.V., Field, R., Guégan, J.-F., Hawkins, B.A., Kaufman,  
704 D.M., Kerr, J.T., Oberdorff, T., O'Brien, E., 2004. Predictions and tests of climate-based  
705 hypotheses of broad-scale variation in taxonomic richness. *Ecology letters* 7, 1121–1134.

706 Daskalova, G.N., Myers-Smith, I.H., Bjorkman, A.D., Blowes, S.A., Supp, S.R., Magurran,  
707 A.E., Dornelas, M., 2020a. Landscape-scale forest loss as a catalyst of population and  
708 biodiversity change. *Science* 368, 1341–1347.

709 Daskalova, G.N., Myers-Smith, I.H., Godlee, J.L., 2020b. Rare and common vertebrates span a  
710 wide spectrum of population trends. *Nature Communications* 4394.

711 Díaz, S., Settele, J., Brondízio, E.S., Ngo, H.T., Agard, J., Arneth, A., Balvanera, P., Brauman,  
712 K.A., Butchart, S.H., Chan, K.M., 2019. Pervasive human-driven decline of life on Earth  
713 points to the need for transformative change. *Science* 366.

714 Dornelas, M., Antao, L.H., Moyes, F., Bates, A.E., Magurran, A.E., Adam, D., Akhmetzhanova,  
715 A.A., Appeltans, W., Arcos, J.M., Arnold, H., 2018. BioTIME: A database of biodiversity  
716 time series for the Anthropocene. *Glob Ecol Biogeogr* 27, 760–786.

717 Dornelas, M., Gotelli, N.J., McGill, B., Shimadzu, H., Moyes, F., Sievers, C., Magurran, A.E.,  
718 2014. Assemblage time series reveal biodiversity change but not systematic loss. *Science* 344,  
719 296–299.

720 Dornelas, M., Gotelli, N.J., Shimadzu, H., Moyes, F., Magurran, A.E., McGill, B.J., 2019. A  
721 balance of winners and losers in the Anthropocene. *Ecol Lett* 22, 847–854.

722 Fisher, R.A., Corbet, A.S., Williams, C.B., 1943. The relation between the number of species  
723 and the number of individuals in a random sample of an animal population. *The Journal of*  
724 *Animal Ecology* 42–58.

725 Gaston, K.J., 2000. Global patterns in biodiversity. *Nature* 405, 220–227.



- 726 Gotelli, N.J., Colwell, R.K., 2001. Quantifying biodiversity: procedures and pitfalls in the  
727 measurement and comparison of species richness. *Ecol Lett* 4, 379–391.
- 728 He, F., Legendre, P., 2002. Species diversity patterns derived from species–area models. *Ecology*  
729 83, 1185–1198.
- 730 Hill, M.O., 1973. Diversity and evenness: a unifying notation and its consequences. *Ecology* 54,  
731 427–432.
- 732 Hillebrand, H., Bennett, D.M., Cadotte, M.W., 2008. Consequences of dominance: a review of  
733 evenness effects on local and regional ecosystem processes. *Ecology* 89, 1510–1520.
- 734 Hillebrand, H., Blasius, B., Borer, E.T., Chase, J.M., Downing, J.A., Eriksson, B.K., Filstrup,  
735 C.T., Harpole, W.S., Hodapp, D., Larsen, S., 2018. Biodiversity change is uncoupled from  
736 species richness trends: Consequences for conservation and monitoring. *Journal of Applied*  
737 *Ecology* 55, 169–184.
- 738 Hudson, L.N., Newbold, T., Contu, S., Hill, S.L., Lysenko, I., De Palma, A., Phillips, H.R.,  
739 Alhusseini, T.I., Bedford, F.E., Bennett, D.J., 2017. The database of the Predicts (Projecting  
740 responses of ecological diversity in changing terrestrial systems) project. *Ecology and*  
741 *Evolution* 7, 145–188.
- 742 Hughes, A.R., Byrnes, J.E., Kimbro, D.L., Stachowicz, J.J., 2007. Reciprocal relationships and  
743 potential feedbacks between biodiversity and disturbance. *Ecology letters* 10, 849–864.
- 744 Hurlbert, S.H., 1971. The nonconcept of species diversity: a critique and alternative parameters.  
745 *Ecology* 52, 577–586.
- 746 Jeliaskov, A., Mijatovic, D., Chantepie, S., Andrew, N., Arlettaz, R., Barbaro, L., Barsoum, N.,  
747 Bartonova, A., Belskaya, E., Bonada, N., 2020. A global database for metacommunity  
748 ecology, integrating species, traits, environment and space. *Scientific data* 7, 1–15.

- 749 Jones, F.A., Magurran, A.E., 2018. Dominance structure of assemblages is regulated over a  
750 period of rapid environmental change. *Biology letters* 14, 20180187.
- 751 Jost, L., 2007. Partitioning diversity into independent alpha and beta components. *Ecology* 88,  
752 2427–2439.
- 753 Jost, L., 2006. Entropy and diversity. *Oikos* 113, 363–375.
- 754 Kreft, H., Jetz, W., Mutke, J., Kier, G., Barthlott, W., 2008. Global diversity of island floras from  
755 a macroecological perspective. *Ecology letters* 11, 116–127.
- 756 Latham, R.E., Ricklefs, R.E., 1993. Global patterns of tree species richness in moist forests:  
757 energy-diversity theory does not account for variation in species richness. *Oikos* 325–333.
- 758 Leung, B., Hargreaves, A.L., Greenberg, D.A., McGill, B., Dornelas, M., Freeman, R., 2020.  
759 Clustered versus catastrophic global vertebrate declines. *Nature* 588, 267–271.
- 760 MacArthur, R.H., 1965. Patterns of species diversity. *Biological reviews* 40, 510–533.
- 761 Magurran, A.E., McGill, B.J., 2011. *Biological diversity: frontiers in measurement and*  
762 *assessment*. Oxford University Press.
- 763 May, F., Gerstner, K., McGlinn, D.J., Xiao, X., Chase, J.M., 2018. mobsim: An R package for  
764 the simulation and measurement of biodiversity across spatial scales. *Methods in Ecology and*  
765 *Evolution* 9, 1401–1408.
- 766 McGill, B.J., 2011a. Linking biodiversity patterns by autocorrelated random sampling. *Am J Bot*  
767 98, 481–502.
- 768 McGill, B.J., 2011b. Species abundance distributions, in: *Biological Diversity: Frontiers In*  
769 *Measurement & Assessment* (Eds Magurran, A. & McGill, B.). Oxford University Press, pp.  
770 105–122.

- 771 McGill, B.J., Etienne, R.S., Gray, J.S., Alonso, D., Anderson, M.J., Benecha, H.K., Dornelas,  
772 M., Enquist, B.J., Green, J.L., He, F., Hurlbert, A.H., Magurran, A.E., Marquet, P.A., Maurer,  
773 B.A., Ostling, A., Soykan, C.U., Ugland, K.I., White, E.P., 2007. Species abundance  
774 distributions: moving beyond single prediction theories to integration within an ecological  
775 framework. *Ecol Lett* 10, 995–1015.
- 776 McGlinn, D.J., Xiao, X., May, F., Gotelli, N.J., Engel, T., Blowes, S.A., Knight, T.M., Purschke,  
777 O., Chase, J.M., McGill, B.J., 2019. Measurement of Biodiversity (MoB): A method to  
778 separate the scale-dependent effects of species abundance distribution, density, and  
779 aggregation on diversity change. *Methods in Ecology and Evolution* 10, 258–269.
- 780 McKinney, M.L., Lockwood, J.L., 1999. Biotic homogenization: a few winners replacing many  
781 losers in the next mass extinction. *Trends in ecology & evolution* 14, 450–453.
- 782 Menge, B.A., Berlow, E.L., Blanchette, C.A., Navarrete, S.A., Yamada, S.B., 1994. The  
783 keystone species concept: variation in interaction strength in a rocky intertidal habitat.  
784 *Ecological monographs* 64, 249–286.
- 785 Miller, A.D., Roxburgh, S.H., Shea, K., 2011. How frequency and intensity shape diversity–  
786 disturbance relationships. *Proceedings of the National Academy of sciences* 108, 5643–5648.
- 787 Mittelbach, G.G., Steiner, C.F., Scheiner, S.M., Gross, K.L., Reynolds, H.L., Waide, R.B.,  
788 Willig, M.R., Dodson, S.I., Gough, L., 2001. What is the observed relationship between  
789 species richness and productivity? *Ecology* 82, 2381–2396.
- 790 Newbold, T., Hudson, L.N., Contu, S., Hill, S.L., Beck, J., Liu, Y., Meyer, C., Phillips, H.R.,  
791 Scharlemann, J.P., Purvis, A., 2018. Widespread winners and narrow-ranged losers: Land use  
792 homogenizes biodiversity in local assemblages worldwide. *PLoS biology* 16, e2006841.

- 793 Newbold, T., Hudson, L.N., Hill, S.L., Contu, S., Lysenko, I., Senior, R.A., Börger, L., Bennett,  
794 D.J., Choimes, A., Collen, B., 2015. Global effects of land use on local terrestrial biodiversity.  
795 Nature 520, 45–50.
- 796 Newbold, T., Oppenheimer, P., Etard, A., Williams, J.J., 2020. Tropical and Mediterranean  
797 biodiversity is disproportionately sensitive to land-use and climate change. Nature Ecology &  
798 Evolution 4, 1630–1638.
- 799 Olszewski, T.D., 2004. A unified mathematical framework for the measurement of richness and  
800 evenness within and among multiple communities. Oikos 104, 377–387.
- 801 Paine, R.T., 1974. Intertidal community structure. Oecologia 15, 93–120.
- 802 Palmer, M.W., Clark, D.B., Clark, D.A., 2000. Is the number of tree species in small tropical  
803 forest plots nonrandom? Community Ecology 1, 95–101.
- 804 Preston, F.W., 1962. The canonical distribution of commonness and rarity: Part I. Ecology 43,  
805 185–215.
- 806 Rosenberg, K.V., Dokter, A.M., Blancher, P.J., Sauer, J.R., Smith, A.C., Smith, P.A., Stanton,  
807 J.C., Panjabi, A., Helft, L., Parr, M., 2019. Decline of the North American avifauna. Science  
808 366, 120–124.
- 809 Rosenzweig, M.L., 1995. Species diversity in space and time. Cambridge University Press.
- 810 Scheiner, S.M., Willig, M.R., 2005. Developing unified theories in ecology as exemplified with  
811 diversity gradients. The American Naturalist 166, 458–469.
- 812 Shmida, A.V.I., Wilson, M.V., 1985. Biological determinants of species diversity. Journal of  
813 biogeography 1–20.
- 814 Soininen, J., Passy, S., Hillebrand, H., 2012. The relationship between species richness and  
815 evenness: a meta-analysis of studies across aquatic ecosystems. Oecologia 169, 803–809.

- 816 Srivastava, D.S., Lawton, J.H., 1998. Why more productive sites have more species: an  
817 experimental test of theory using tree-hole communities. *The American Naturalist* 152, 510–  
818 529.
- 819 Stirling, G., Wilsey, B., 2001. Empirical relationships between species richness, evenness, and  
820 proportional diversity. *The American Naturalist* 158, 286–299.
- 821 Storch, D., Bohdalková, E., Okie, J., 2018. The more-individuals hypothesis revisited: the role of  
822 community abundance in species richness regulation and the productivity–diversity  
823 relationship. *Ecol Lett* 21, 920–937.
- 824 Tilman, D., 1982. *Resource competition and community structure*. Princeton University Press.
- 825 Vagle, G.L., McCain, C.M., n.d. Natural population variability may be masking the more-  
826 individuals hypothesis. *Ecology* 101, e03035.
- 827 Van Klink, R., Bowler, D.E., Gongalsky, K.B., Swengel, A.B., Gentile, A., Chase, J.M., 2020.  
828 Meta-analysis reveals declines in terrestrial but increases in freshwater insect abundances.  
829 *Science* 368, 417–420.
- 830 Vilà, M., Espinar, J.L., Hejda, M., Hulme, P.E., Jarošík, V., Maron, J.L., Pergl, J., Schaffner, U.,  
831 Sun, Y., Pyšek, P., 2011. Ecological impacts of invasive alien plants: a meta-analysis of their  
832 effects on species, communities and ecosystems. *Ecology letters* 14, 702–708.
- 833 Wagner, D.L., 2020. Insect declines in the Anthropocene. *Annual review of entomology* 65,  
834 457–480.
- 835 Whittaker, R.J., Willis, K.J., Field, R., 2001. Scale and species richness: towards a general,  
836 hierarchical theory of species diversity. *Journal of biogeography* 28, 453–470.
- 837 Wright, D.H., 1983. Species-energy theory: an extension of species-area theory. *Oikos* 496–506.

- 838 WWF, 2020. Living Planet Report 2020-Bending the curve of biodiversity loss. World Wildlife  
839 Fund, Gland, Switzerland.
- 840 Zhang, Y., Chen, H.Y., Reich, P.B., 2012. Forest productivity increases with evenness, species  
841 richness and trait variation: a global meta-analysis. *Journal of ecology* 100, 742–749.
- 842

843 **Figure 1:** (a) Individual-based rarefaction (IBR) curves for two hypothetical assemblages,  
844 showing the four components we use to quantify change ( $N$ ,  $S$ ,  $S_n$ , PIE). We visualize  
845 relationships between these four components of the IBR curve by plotting: (b) changes in species  
846 richness ( $\Delta S$ ) as a function of altered numbers of individuals ( $\Delta N$ ), (c) changes in species  
847 richness ( $\Delta S$ ) as a function of changes in rarefied richness ( $\Delta S_n$ ), and (d) changes in species  
848 richness ( $\Delta S$ ) as a function of the numbers equivalent conversion of the Probability of  
849 Interspecific Encounter ( $\Delta S_{PIE}$ ). We show  $\Delta PIE$  on the figure to illustrate changes of the PIE (it is  
850 equivalent to the slope at the base of the curve) with the IBR, but use the numbers equivalent  
851 transformation ( $\Delta S_{PIE}$ ) in all analyses. Points on panels (b, c, and d) show changes between the  
852 two hypothetical assemblages, with the reference assemblage depicted by the grey line.

853  
854 **Figure 2:** Conceptual illustrations of potential pathways of local assemblage diversity change  
855 and corresponding relationships between component changes. Starting from a reference  
856 assemblage (depicted with grey rarefaction curves), diversity change can be due to (a) more  
857 individuals only, (b) changes to the species abundance distribution only (e.g., increased species  
858 pool size or increased evenness), or (c) changes in total abundance and the SAD that result in  
859 positive pairwise relationships between  $\Delta N$ ,  $\Delta S_n$ ,  $\Delta S_{PIE}$ , and  $\Delta S$ . However, if the signs of  $\Delta N$  and  
860  $\Delta S_{PIE}$  differ, their relationships with  $\Delta S$  weaken and species richness can (d) remain static, (e)  
861 decrease or (f) increase. We visualize pairwise relationships between component changes for  
862 each scenario (i.e., the different shaped symbols) using: (g) changes in species richness as a  
863 function of changes to the number of individuals, (h) changes in species richness as a function of  
864 changes in rarefied richness, and (i) changes in species richness as a function of changes in  
865 evenness.

866 **Figure 3:** Empirical relationships between four components of local diversity change. Change in  
867 species richness as a function of changes in the numbers of individuals (left column), rarefied  
868 richness (middle column), and evenness (right column) for (a-c) study-level estimates of  
869 temporal changes in naturally varying environments; (d-f) estimates of temporal change for  
870 combinations of study and treatment in perturbed environments; (g-i) estimates of spatial  
871 changes within studies from an arbitrary reference site along natural environmental gradients;  
872 and, (j-l) estimates of spatial change within studies between primary vegetation and different  
873 land use categories. Colored concentration ellipses show the confidence interval (5 and 95%) of  
874 the posterior distributions. Dotted grey lines are  $x$  and  $y = 0$ , and  $x = y$ . See Appendix S1: Figure  
875 S6 for remaining pairwise relationships. Scale of  $x$ - and  $y$ -axes vary between panels; one  
876 estimate with  $\Delta\log(N) = -1.79$ ,  $\Delta\log(S) = -3.77$ ,  $\Delta\log(S_n) = -3.23$ ,  $\Delta\log(S_{PIE}) = -3.21$ , removed  
877 from (j-l) for clarity.

878

879 **Figure 4:** Component correlations among studies within each data source. Density plots for the  
880 posterior distribution of pairwise correlations between component changes for (a) temporal  
881 comparison in naturally varying environments, (b) temporal comparisons in perturbed  
882 environments, (c) spatial comparisons along natural gradients, and (d) spatial comparisons  
883 between different land use categories. Correlations estimated separately for sites and land use  
884 categories relative to the references were combined on (c) and (d).

885

886



887 Figure 1

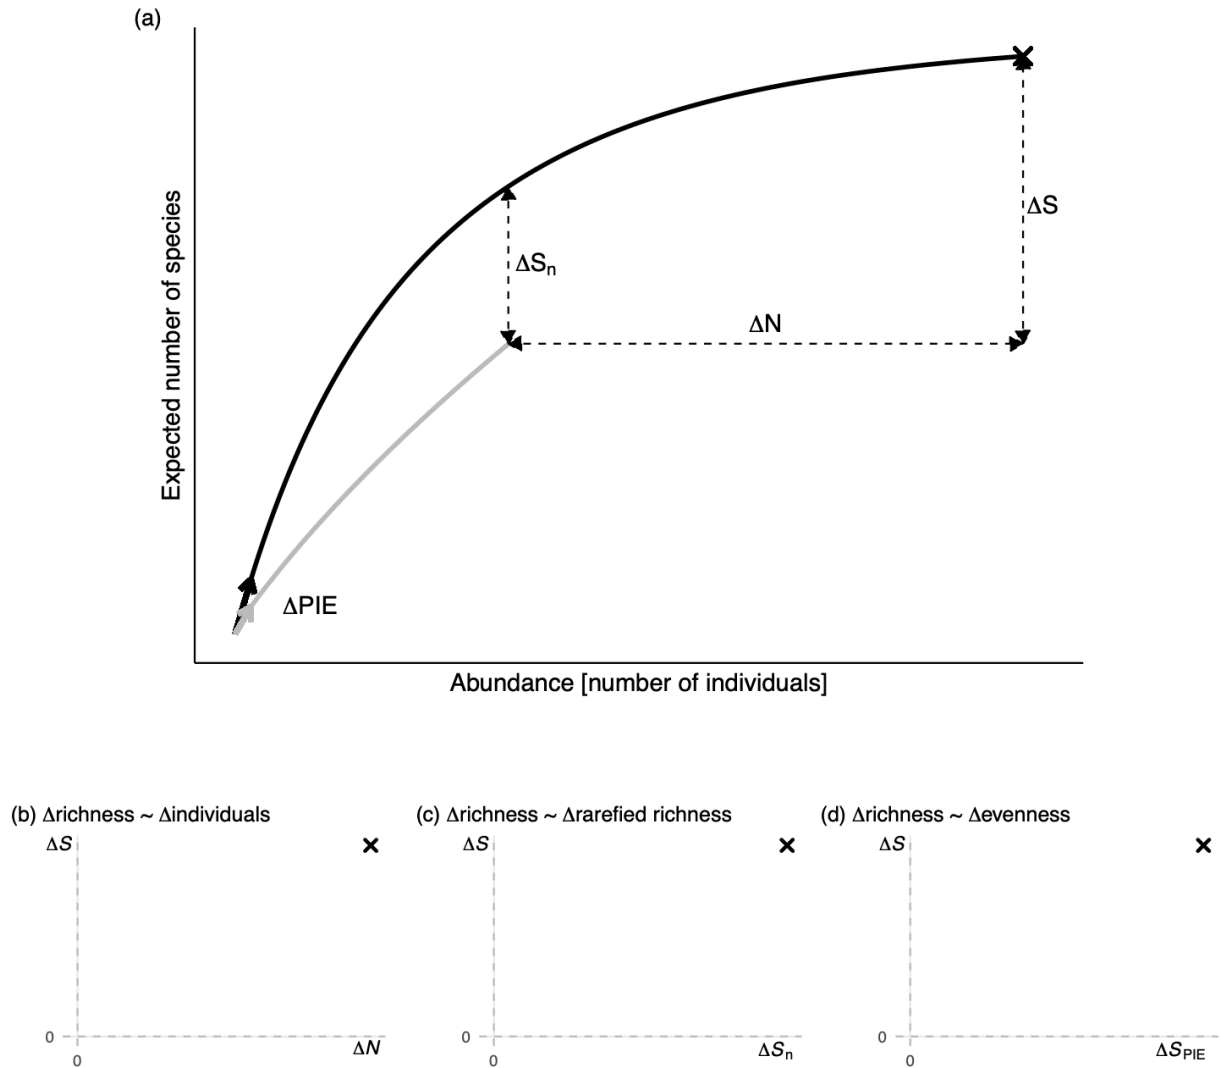

888

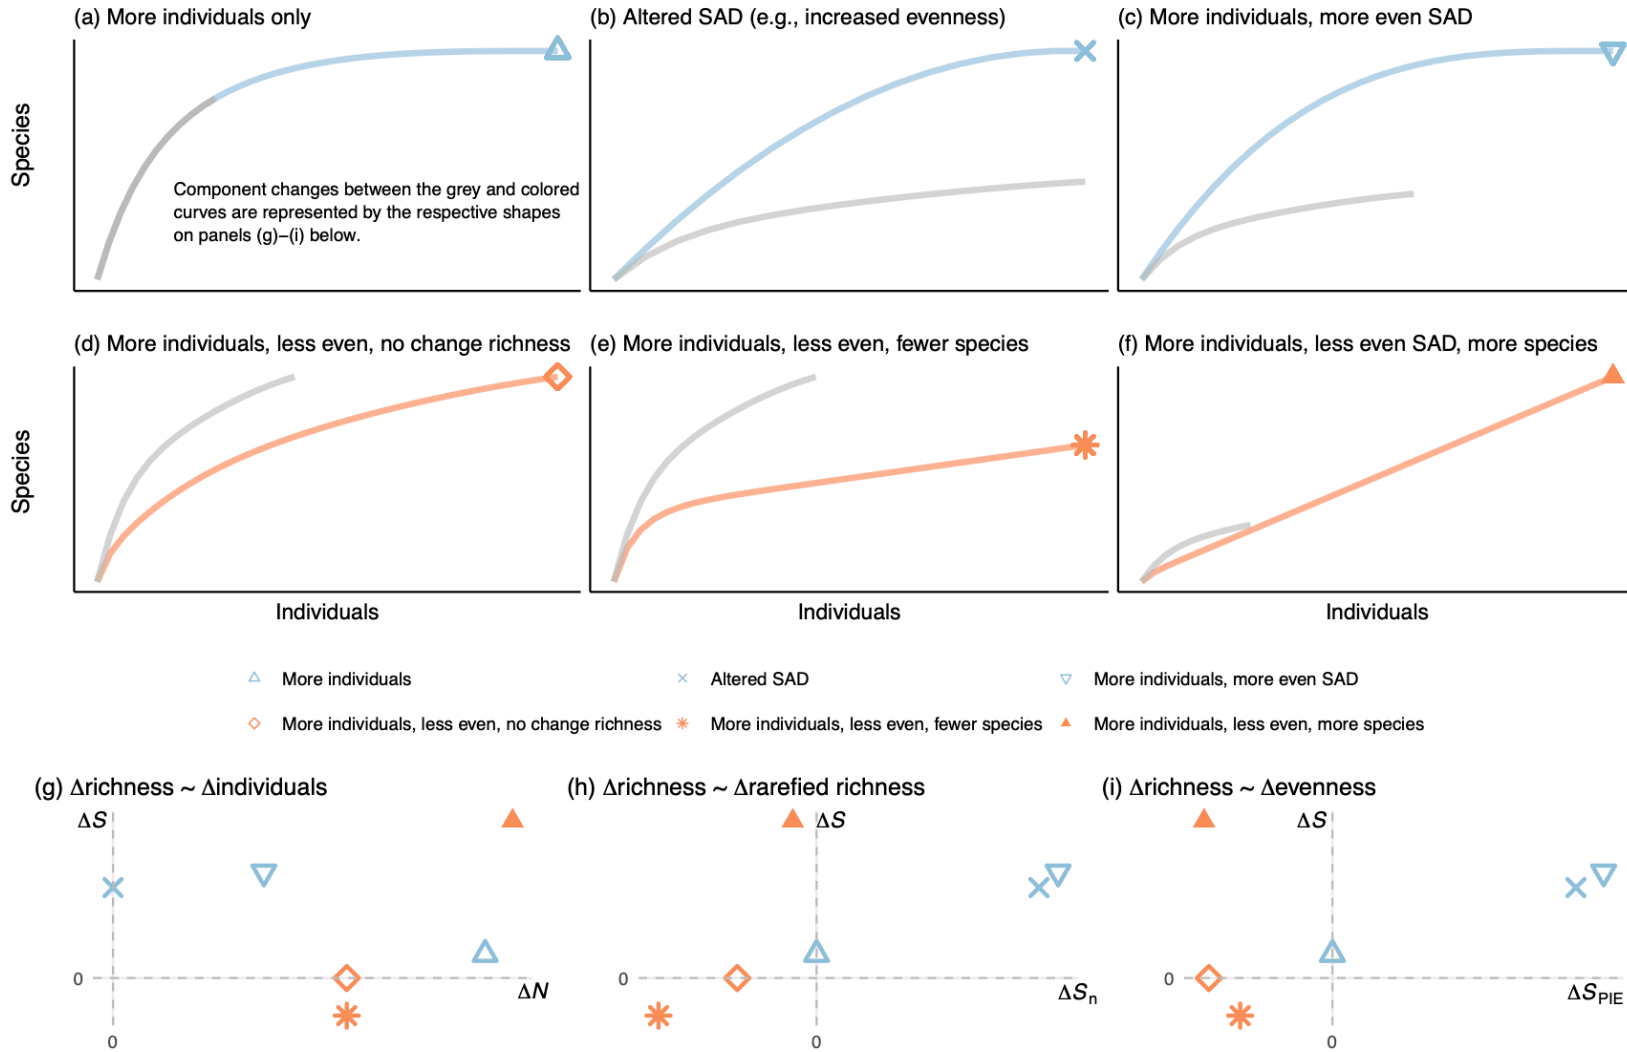

891 Figure 3

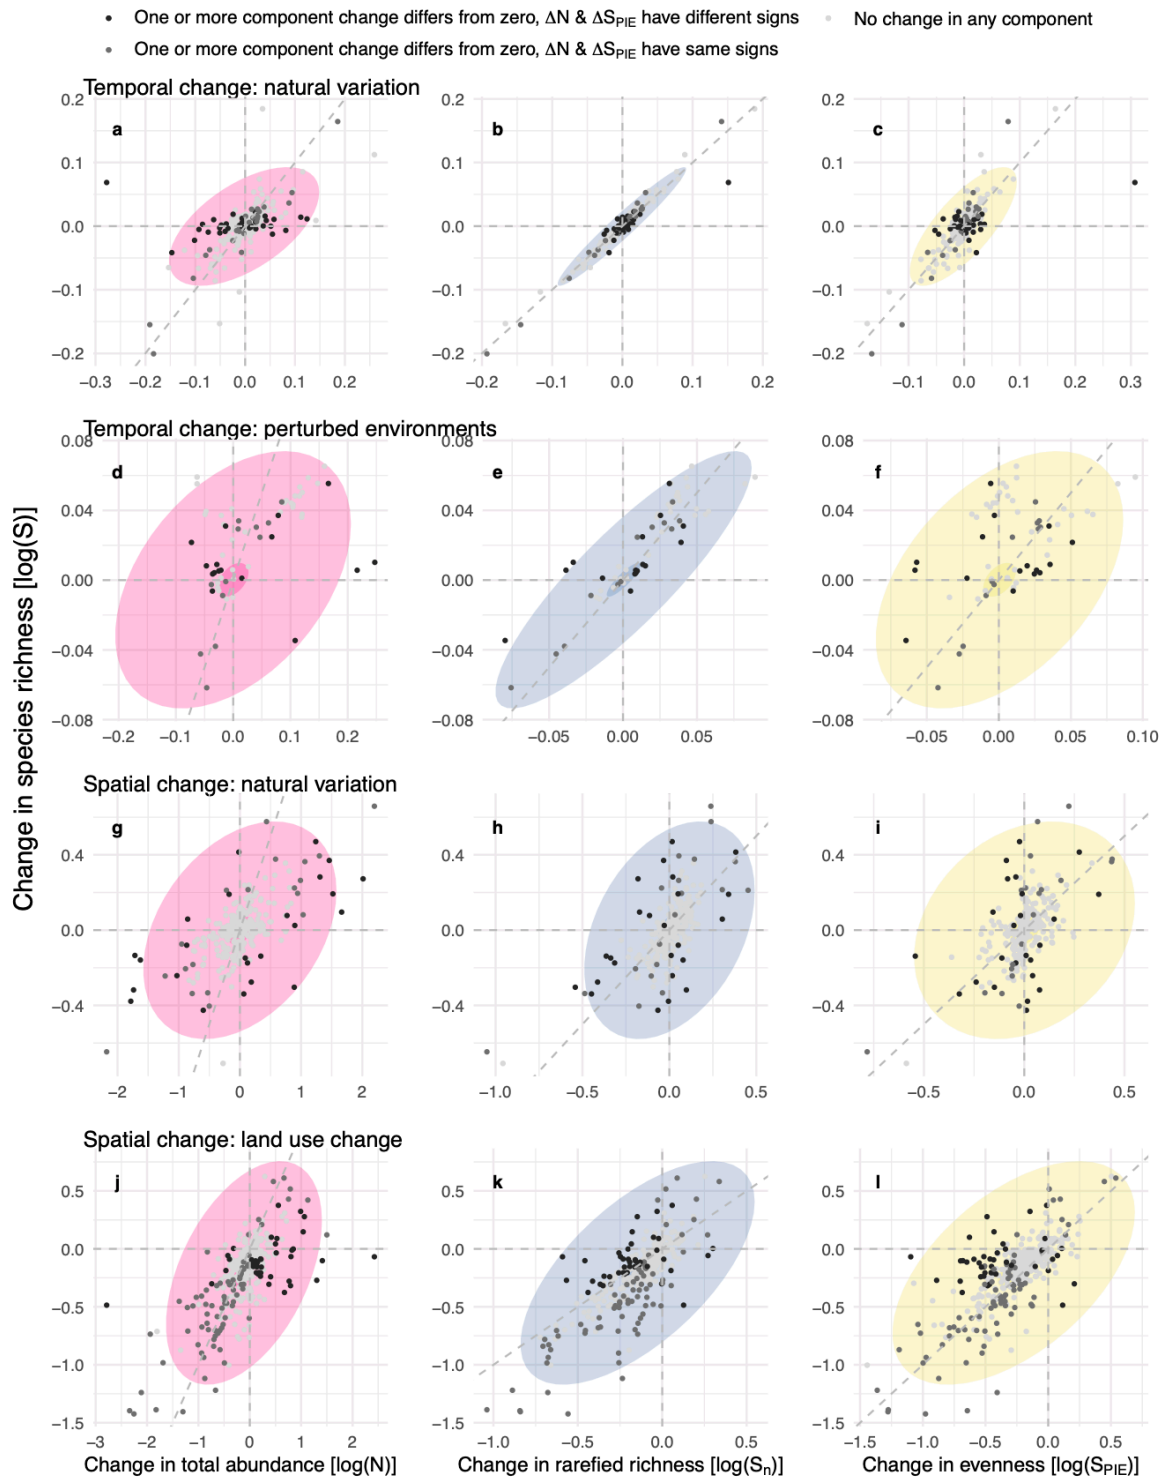

892

893

894 Figure 4

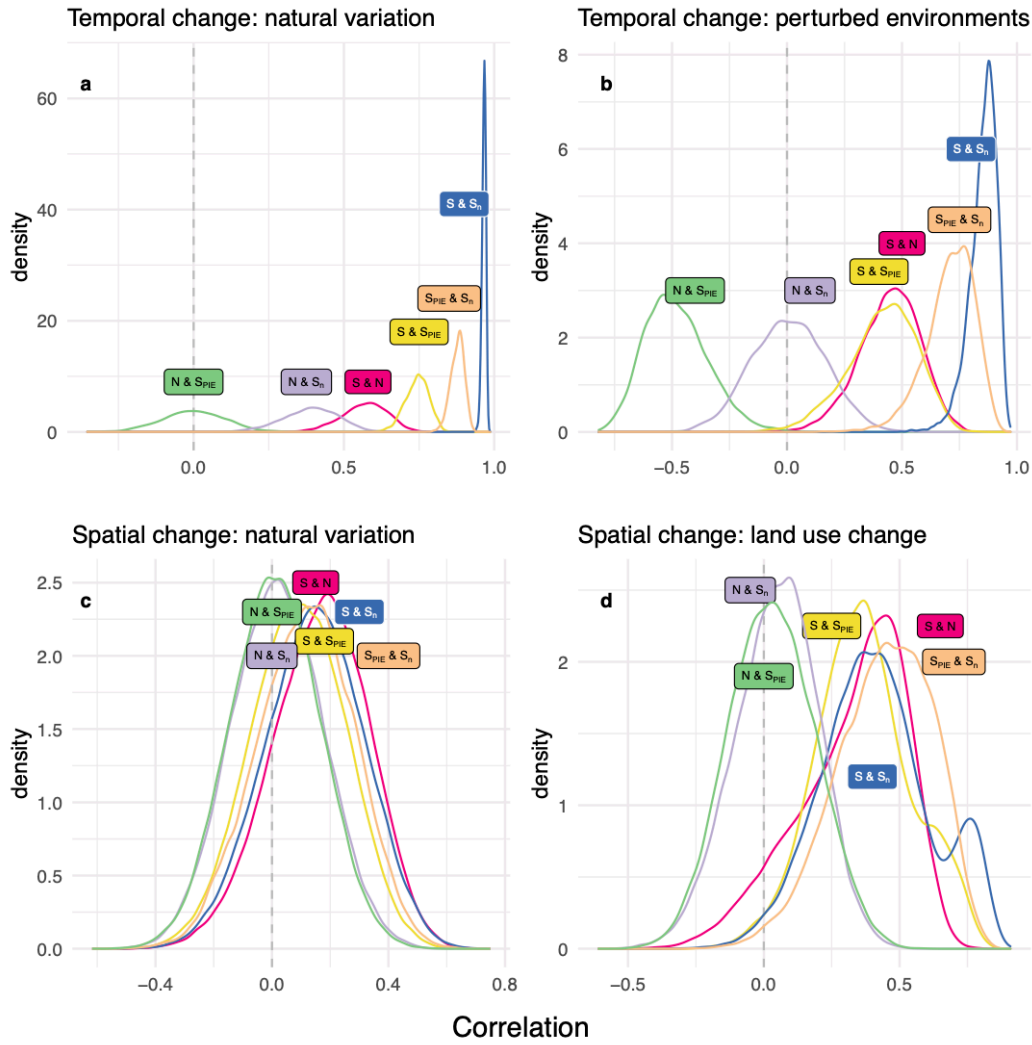

895

896

897 **Appendix S1**

898

899 **Title:** Local biodiversity change reflects interactions among changing abundance, evenness and  
900 richness

901

902 **Authors:** Shane A. Blowes, Gergana N. Daskalova, Maria Dornelas, Thore Engel, Nicholas J.  
903 Gotelli, Anne E. Magurran, Inês S. Martins, Brian McGill, Daniel J. McGlinn, Alban Sagouis  
904 Hideyasu Shimadzu, Sarah R. Supp, Jonathan M. Chase

905

906 **Journal:** Ecology

907

908

909 **Table S1:** Countervailing changes in abundance ( $\Delta N$ ) and evenness ( $\Delta S_{PIE}$ ) often result in  
910 components other than richness changing. Component(s) with high probability of change as per  
911 Figure 2 (i.e., 90% CI does not overlap zero); each row shows the number of assemblages with  
912 either countervailing [ $\text{sign}(\Delta N) \times \text{sign}(\Delta S_{PIE}) = -1$ ] or abundance and evenness changes with the  
913 same direction [ $\text{sign}(\Delta N) \times \text{sign}(\Delta S_{PIE}) = 1$ ] for the different data sources.

914

|                                                 |                                                                 | <b>Temporal<br/>change:<br/>natural<br/>variation</b> | <b>Temporal<br/>change:<br/>perturbed<br/>environments</b> | <b>Spatial<br/>change:<br/>natural<br/>variation</b> | <b>Spatial<br/>change:<br/>land use<br/>change</b> |
|-------------------------------------------------|-----------------------------------------------------------------|-------------------------------------------------------|------------------------------------------------------------|------------------------------------------------------|----------------------------------------------------|
| Component with<br>high probability of<br>change | $\text{sign}(\Delta N) \times$<br>$\text{sign}(\Delta S_{PIE})$ | Number of<br>assemblages                              | Number of<br>assemblages                                   | Number of<br>assemblages                             | Number of<br>assemblages                           |
| None                                            | -1                                                              | 97                                                    | 23                                                         | 154                                                  | 107                                                |
| None                                            | 1                                                               | 131                                                   | 12                                                         | 214                                                  | 191                                                |
| $N$ only                                        | -1                                                              | 7                                                     | 0                                                          | 7                                                    | 5                                                  |
| $N$ only                                        | 1                                                               | 2                                                     | 1                                                          | 3                                                    | 5                                                  |
| $S_{PIE}$ only                                  | -1                                                              | 6                                                     | 0                                                          | 1                                                    | 10                                                 |
| $S_{PIE}$ only                                  | 1                                                               | 2                                                     | 0                                                          | 2                                                    | 12                                                 |
| $S_n$ only                                      | -1                                                              | 0                                                     | 1                                                          | 7                                                    | 1                                                  |
| $S_n$ only                                      | 1                                                               | 1                                                     | 1                                                          | 3                                                    | 0                                                  |
| $S$ only                                        | -1                                                              | 1                                                     | 0                                                          | 2                                                    | 1                                                  |
| $S$ only                                        | 1                                                               | 1                                                     | 0                                                          | 5                                                    | 6                                                  |
| $S$ & $S_n$                                     | -1                                                              | 0                                                     | 0                                                          | 1                                                    | 1                                                  |

|                        |    |    |   |   |    |
|------------------------|----|----|---|---|----|
| $S \& S_n$             | 1  | 6  | 2 | 3 | 6  |
| $S \& S_{PIE}$         | -1 | 0  | 0 | 0 | 0  |
| $S \& S_{PIE}$         | 1  | 1  | 0 | 1 | 3  |
| $S \& N$               | -1 | 1  | 3 | 0 | 3  |
| $S \& N$               | 1  | 0  | 1 | 3 | 10 |
| $S_n \& S_{PIE}$       | -1 | 3  | 4 | 2 | 9  |
| $S_n \& S_{PIE}$       | 1  | 0  | 0 | 0 | 1  |
| $S_n \& N$             | -1 | 0  | 0 | 1 | 1  |
| $S_n \& N$             | 1  | 0  | 1 | 0 | 0  |
| $N \& S_{PIE}$         | -1 | 4  | 0 | 0 | 3  |
| $N \& S_{PIE}$         | 1  | 0  | 0 | 0 | 0  |
| $S_n, N \& S_{PIE}$    | -1 | 3  | 4 | 0 | 6  |
| $S_n, N \& S_{PIE}$    | 1  | 0  | 0 | 0 | 0  |
| $S, N \& S_{PIE}$      | -1 | 2  | 0 | 0 | 0  |
| $S, N \& S_{PIE}$      | 1  | 1  | 0 | 0 | 4  |
| $S, S_n, N \& S_{PIE}$ | -1 | 7  | 4 | 0 | 2  |
| $S, S_n, N \& S_{PIE}$ | 1  | 12 | 6 | 1 | 31 |

915  
916  
917  
918  
919  
920

921 *Temporal comparisons: natural environmental variation*

922 We fit a model that assumed a lognormal distribution for total abundance ( $N$ ), and  
 923 poisson distributions (with log link functions) for species richness ( $S$ ), rarefied richness ( $S_n$ ) and  
 924 evenness ( $S_{PIE}$ ). We ran the model with four chains for 2000 iterations, with 1000 used as  
 925 warmup. The model took the following form:

926 
$$N_{ijt} \sim \text{lognormal}(\mu_{ijt}^N, \sigma),$$

927 
$$S_{ijt} \sim \text{pois}(\lambda_{ijt}^S),$$

928 
$$S_{n_{ijt}} \sim \text{pois}(\lambda_{ijt}^{S_n}),$$

929 
$$S_{PIE_{ijt}} \sim \text{pois}(\lambda_{ijt}^{S_{PIE}}),$$

930 
$$\mu_{ijt}^N = \beta_0^N + \beta_{0i}^N + \beta_{0ij}^N + (\beta_1^N + \beta_{1i}^N + \beta_{1ij}^N) \text{year}_{ijt},$$

931 
$$\log(\lambda_{ijt}^S) = \beta_0^S + \beta_{0i}^S + \beta_{0ij}^S + (\beta_1^S + \beta_{1i}^S + \beta_{1ij}^S) \text{year}_{ijt},$$

932 
$$\log(\lambda_{ijt}^{S_n}) = \beta_0^{S_n} + \beta_{0i}^{S_n} + \beta_{0ij}^{S_n} + (\beta_1^{S_n} + \beta_{1i}^{S_n} + \beta_{1ij}^{S_n}) \text{year}_{ijt},$$

933 
$$\log(\lambda_{ijt}^{S_{PIE}}) = \beta_0^{S_{PIE}} + \beta_{0i}^{S_{PIE}} + \beta_{0ij}^{S_{PIE}} + (\beta_1^{S_{PIE}} + \beta_{1i}^{S_{PIE}} + \beta_{1ij}^{S_{PIE}}) \text{year}_{ijt},$$

934 
$$[\beta_{0i}^N, \beta_{0i}^S, \beta_{0i}^{S_n}, \beta_{0i}^{S_{PIE}}, \beta_{1i}^N, \beta_{1i}^S, \beta_{1i}^{S_n}, \beta_{1i}^{S_{PIE}}]' \sim \text{MVNormal}(\mathbf{0}, \mathbf{SRS}),$$

935 
$$\mathbf{S} = \begin{bmatrix} \sigma_{0i}^N & 0 & 0 & 0 & 0 & 0 & 0 & 0 \\ 0 & \sigma_{0i}^S & 0 & 0 & 0 & 0 & 0 & 0 \\ 0 & 0 & \sigma_{0i}^{S_n} & 0 & 0 & 0 & 0 & 0 \\ 0 & 0 & 0 & \sigma_{0i}^{S_{PIE}} & 0 & 0 & 0 & 0 \\ 0 & 0 & 0 & 0 & \sigma_{1i}^N & 0 & 0 & 0 \\ 0 & 0 & 0 & 0 & 0 & \sigma_{1i}^S & 0 & 0 \\ 0 & 0 & 0 & 0 & 0 & 0 & \sigma_{1i}^{S_n} & 0 \\ 0 & 0 & 0 & 0 & 0 & 0 & 0 & \sigma_{1i}^{S_{PIE}} \end{bmatrix},$$

936 
$$\mathbf{R} = \begin{bmatrix} 1 & \rho_{N_{0i}S_{0i}} & \rho_{N_{0i}S_{n_{0i}}} & \rho_{N_{0i}S_{PIE_{0i}}} & \rho_{N_{0i}N_{1i}} & \rho_{N_{0i}S_{1i}} & \rho_{N_{0i}S_{n_{1i}}} & \rho_{N_{0i}S_{PIE_{1i}}} \\ \rho_{N_{0i}S_{0i}} & 1 & \rho_{S_{0i}S_{n_{0i}}} & \rho_{S_{0i}S_{PIE_{0i}}} & \rho_{S_{0i}N_{1i}} & \rho_{S_{0i}S_{1i}} & \rho_{S_{0i}S_{n_{1i}}} & \rho_{S_{0i}S_{PIE_{1i}}} \\ \rho_{N_{0i}S_{n_{0i}}} & \rho_{S_{0i}S_{n_{0i}}} & 1 & \rho_{S_{n_{0i}}S_{PIE_{0i}}} & \rho_{S_{n_{0i}}N_{1i}} & \rho_{S_{n_{0i}}S_{1i}} & \rho_{S_{n_{0i}}S_{n_{1i}}} & \rho_{S_{n_{0i}}S_{PIE_{1i}}} \\ \rho_{N_{0i}S_{PIE_{0i}}} & \rho_{S_{0i}S_{PIE_{0i}}} & \rho_{S_{n_{0i}}S_{PIE_{0i}}} & 1 & \rho_{S_{PIE_{0i}}N_{1i}} & \rho_{S_{PIE_{0i}}S_{1i}} & \rho_{S_{PIE_{0i}}S_{n_{1i}}} & \rho_{S_{PIE_{0i}}S_{PIE_{1i}}} \\ \rho_{N_{0i}N_{1i}} & \rho_{S_{0i}N_{1i}} & \rho_{S_{n_{0i}}N_{1i}} & \rho_{S_{PIE_{0i}}N_{1i}} & 1 & \rho_{N_{1i}S_{1i}} & \rho_{N_{1i}S_{n_{1i}}} & \rho_{N_{1i}S_{PIE_{1i}}} \\ \rho_{N_{0i}S_{1i}} & \rho_{S_{0i}S_{1i}} & \rho_{S_{n_{0i}}S_{1i}} & \rho_{S_{PIE_{0i}}S_{1i}} & \rho_{N_{1i}S_{1i}} & 1 & \rho_{S_{1i}S_{n_{1i}}} & \rho_{S_{1i}S_{PIE_{1i}}} \\ \rho_{N_{0i}S_{n_{1i}}} & \rho_{S_{0i}S_{n_{1i}}} & \rho_{S_{n_{0i}}S_{n_{1i}}} & \rho_{S_{PIE_{0i}}S_{n_{1i}}} & \rho_{N_{1i}S_{n_{1i}}} & \rho_{S_{1i}S_{n_{1i}}} & 1 & \rho_{S_{n_{1i}}S_{PIE_{1i}}} \\ \rho_{N_{0i}S_{PIE_{1i}}} & \rho_{S_{0i}S_{PIE_{1i}}} & \rho_{S_{n_{0i}}S_{PIE_{1i}}} & \rho_{S_{PIE_{0i}}S_{PIE_{1i}}} & \rho_{N_{1i}S_{PIE_{1i}}} & \rho_{S_{1i}S_{PIE_{1i}}} & \rho_{S_{n_{1i}}S_{PIE_{1i}}} & 1 \end{bmatrix},$$

937 
$$[\beta_{0ij}^N, \beta_{0ij}^S, \beta_{0ij}^{S_n}, \beta_{0ij}^{S_{PIE}}, \beta_{1ij}^N, \beta_{1ij}^S, \beta_{1ij}^{S_n}, \beta_{1ij}^{S_{PIE}}]' \sim \text{MVNormal}(\mathbf{0}, \mathbf{SRS}),$$

938 
$$\mathbf{S} = \begin{bmatrix} \sigma_{0ij}^N & 0 & 0 & 0 & 0 & 0 & 0 & 0 \\ 0 & \sigma_{0ij}^S & 0 & 0 & 0 & 0 & 0 & 0 \\ 0 & 0 & \sigma_{0ij}^{S_n} & 0 & 0 & 0 & 0 & 0 \\ 0 & 0 & 0 & \sigma_{0ij}^{S_{PIE}} & 0 & 0 & 0 & 0 \\ 0 & 0 & 0 & 0 & \sigma_{1ij}^N & 0 & 0 & 0 \\ 0 & 0 & 0 & 0 & 0 & \sigma_{1ij}^S & 0 & 0 \\ 0 & 0 & 0 & 0 & 0 & 0 & \sigma_{1ij}^{S_n} & 0 \\ 0 & 0 & 0 & 0 & 0 & 0 & 0 & \sigma_{1ij}^{S_{PIE}} \end{bmatrix},$$

939 
$$\mathbf{R} = \begin{bmatrix} 1 & \rho_{N_{0ij}S_{0ij}} & \rho_{N_{0ij}S_{n0ij}} & \rho_{N_{0ij}S_{PIE0ij}} & \rho_{N_{0ij}N_{1ij}} & \rho_{N_{0ij}S_{1ij}} & \rho_{N_{0ij}S_{n1ij}} & \rho_{N_{0ij}S_{PIE1ij}} \\ \rho_{N_{0ij}S_{0ij}} & 1 & \rho_{S_{0ij}S_{n0ij}} & \rho_{S_{0ij}S_{PIE0ij}} & \rho_{S_{0ij}N_{1ij}} & \rho_{S_{0ij}S_{1ij}} & \rho_{S_{0ij}S_{n1ij}} & \rho_{S_{0ij}S_{PIE1ij}} \\ \rho_{N_{0ij}S_{n0ij}} & \rho_{S_{0ij}S_{n0ij}} & 1 & \rho_{S_{n0ij}S_{PIE0ij}} & \rho_{S_{n0ij}N_{1ij}} & \rho_{S_{n0ij}S_{1ij}} & \rho_{S_{n0ij}S_{n1ij}} & \rho_{S_{n0ij}S_{PIE1ij}} \\ \rho_{N_{0ij}S_{PIE0ij}} & \rho_{S_{0ij}S_{PIE0ij}} & \rho_{S_{n0ij}S_{PIE0ij}} & 1 & \rho_{S_{PIE0ij}N_{1ij}} & \rho_{S_{PIE0ij}S_{1ij}} & \rho_{S_{PIE0ij}S_{n1ij}} & \rho_{S_{PIE0ij}S_{PIE1ij}} \\ \rho_{N_{0ij}N_{1ij}} & \rho_{S_{0ij}N_{1ij}} & \rho_{S_{n0ij}N_{1ij}} & \rho_{S_{PIE0ij}N_{1ij}} & 1 & \rho_{N_{1ij}S_{1ij}} & \rho_{N_{1ij}S_{n1ij}} & \rho_{N_{1ij}S_{PIE1ij}} \\ \rho_{N_{0ij}S_{1ij}} & \rho_{S_{0ij}S_{1ij}} & \rho_{S_{n0ij}S_{1ij}} & \rho_{S_{PIE0ij}S_{1ij}} & \rho_{N_{1ij}S_{1ij}} & 1 & \rho_{S_{1ij}S_{n1ij}} & \rho_{S_{1ij}S_{PIE1ij}} \\ \rho_{N_{0ij}S_{n1ij}} & \rho_{S_{0ij}S_{n1ij}} & \rho_{S_{n0ij}S_{n1ij}} & \rho_{S_{PIE0ij}S_{n1ij}} & \rho_{N_{1ij}S_{n1ij}} & \rho_{S_{1ij}S_{n1ij}} & 1 & \rho_{S_{n1ij}S_{PIE1ij}} \\ \rho_{N_{0ij}S_{PIE1ij}} & \rho_{S_{0ij}S_{PIE1ij}} & \rho_{S_{n0ij}S_{PIE1ij}} & \rho_{S_{PIE0ij}S_{PIE1ij}} & \rho_{N_{1ij}S_{PIE1ij}} & \rho_{S_{1ij}S_{PIE1ij}} & \rho_{S_{n1ij}S_{PIE1ij}} & 1 \end{bmatrix}$$

941 
$$\beta_0^N, \beta_0^S, \beta_0^{S_n}, \beta_0^{S_{PIE}} \sim N(0, 1),$$

942 
$$\beta_1^N, \beta_1^S, \beta_1^{S_n}, \beta_1^{S_{PIE}} \sim N(0, 0.2),$$

943 
$$\sigma_{0i}^S, \sigma_{0i}^{S_n}, \sigma_{0i}^{S_{PIE}}, \sigma_{1i}^S, \sigma_{1i}^{S_n}, \sigma_{1i}^{S_{PIE}}, \sigma_{0ij}^S, \sigma_{0ij}^{S_n}, \sigma_{0ij}^{S_{PIE}}, \sigma_{1ij}^S, \sigma_{1ij}^{S_n}, \sigma_{1ij}^{S_{PIE}} \sim student(3, 0, 10),$$

944 
$$\sigma, \sigma_{0i}^N, \sigma_{1ij}^N, \sigma_{0ij}^N, \sigma_{1ij}^N \sim student(3, 0, 16),$$

945 
$$\mathbf{R} \sim LJK(1),$$

946 where  $N_{ijt}$ ,  $S_{ijt}$ ,  $S_{nijt}$ , and  $S_{PIEijt}$  are the values of each of the metrics in the  $j$ th cell of the  $i$ th  
 947 study in year  $t$ , and  $year_{ijt}$  is the time in years.  $\beta_0$  and  $\beta_1$  (with the respective superscripts for each  
 948 metric) represent the non-varying intercepts and slopes, respectively.  $\beta_{0i}$  and  $\beta_{1i}$  (with the  
 949 respective superscripts for each metric) represent the varying intercepts and slopes for study-  
 950 level departures from  $\beta_0$  and  $\beta_1$ , respectively.  $\beta_{0ij}$  and  $\beta_{1ij}$  (with the respective superscripts for  
 951 each metric) represent the varying intercepts and slopes for cell-level departures from  $\beta_0$  and  $\beta_1$ ,  
 952 respectively. The covariance matrices of each multivariate normal distribution for varying effects  
 953 (one each for the study- and cell-level departures) are parameterised in terms of a correlation  
 954 matrix  $\mathbf{R}$  and two matrices  $\mathbf{S}$  with diagonal elements  $\sigma$  (superscripts for metrics, subscripts  
 955 denote intercept (0), slopes (1) and level: studies  $i$  and cells  $j$ ).



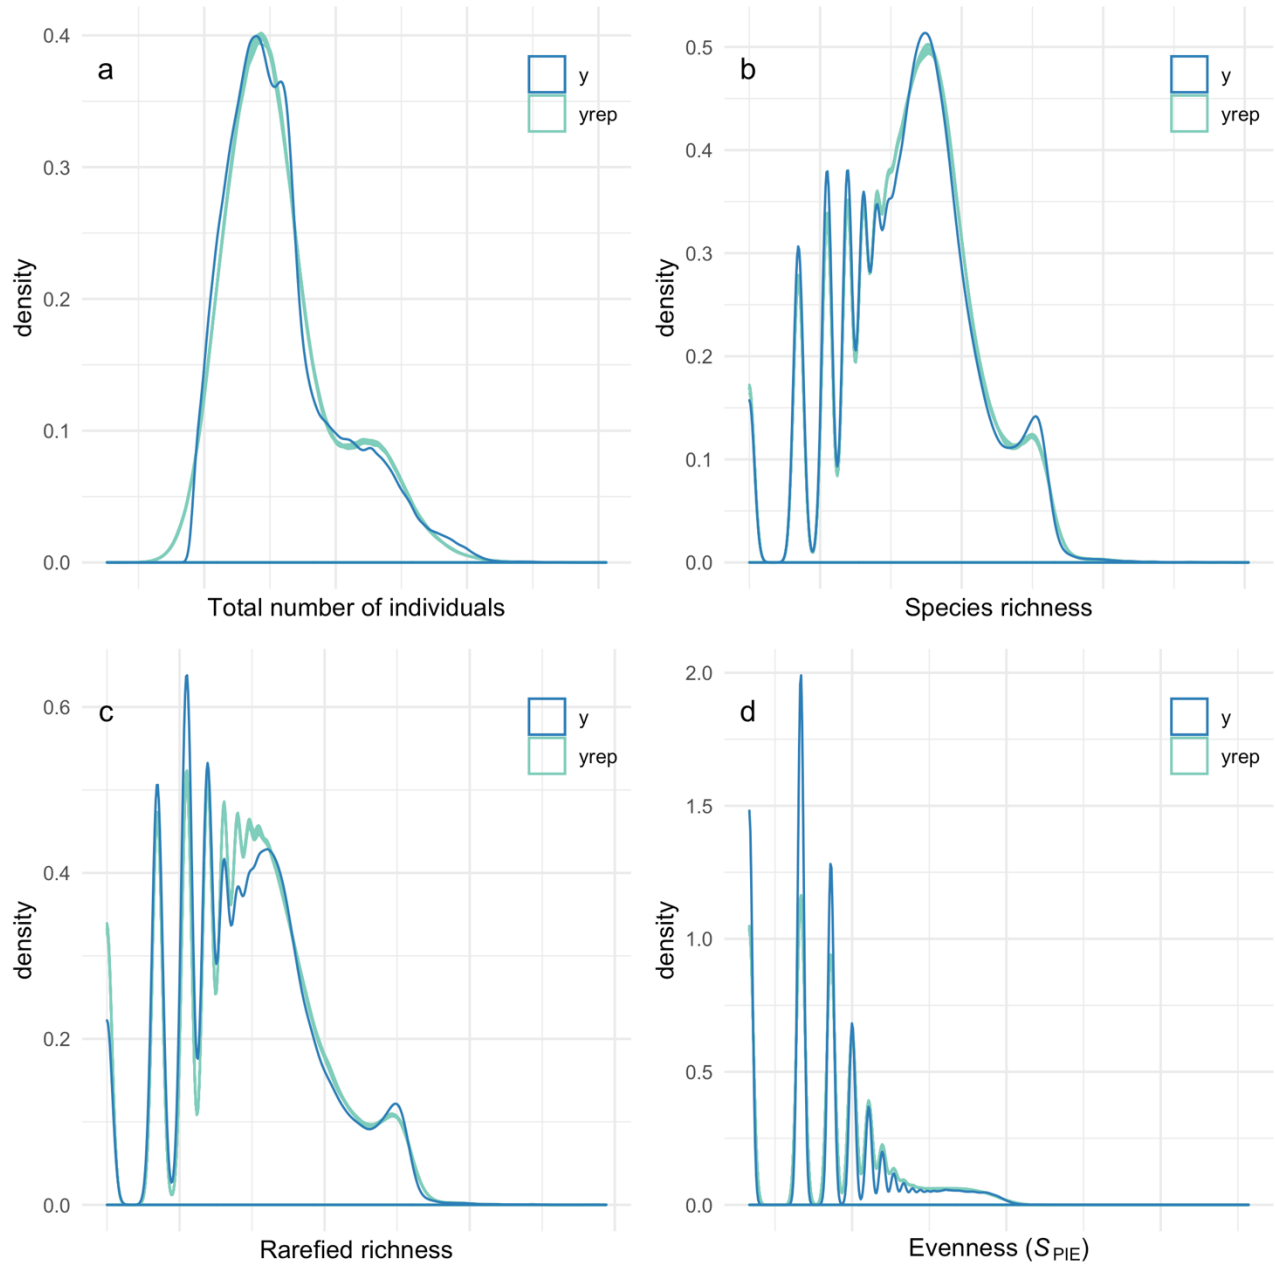

957

958

959

960

Figure S1: Posterior predictive checks for the model fit to the temporal data in naturally varying environments. (a) Total numbers of individuals, (b) species richness, (c) rarefied richness ( $S_n$ ) and (d) evenness ( $S_{PIE}$ ). Each panel shows the density of the data (y) and ten draws of the posterior distribution (yrep).

961

962 *Temporal comparisons: experimental or natural perturbations*

963

964 We fit a model that assumed lognormal distributions for all response variables ( $N$ ,  $S$ ,  $S_n$ ,  $S_{PIE}$ ).

965 Our focus is on the treatment-level variation in the metrics, and we created a covariate that was

966 the concatenation of study and treatment to this end. Additionally, as some studies had blocks

967 within sites, and others did not, we created a new variable that was the concatenation of site and

968 block, where those without block had no unique identifier. We ran the model with four chains for

969 3000 iterations, with 1500 used as warmup. The model took the following form:

970

971

$$N_{ijkt} \sim \text{lognormal}(\mu_{ijkt}^N, \sigma^N),$$

972

$$S_{ijkt} \sim \text{lognormal}(\mu_{ijkt}^S, \sigma^S),$$

973

$$S_{n_{ijkt}} \sim \text{lognormal}(\mu_{ijkt}^{S_n}, \sigma^{S_n}),$$

974

$$S_{PIE_{ijkt}} \sim \text{lognormal}(\mu_{ijkt}^{S_{PIE}}, \sigma^{S_{PIE}}),$$

975

$$\mu_{ijkt}^N = \beta_0^N + \beta_{0i}^N + \beta_{0j}^N + \beta_{0k}^N + (\beta_1^N + \beta_{1k}^N) \text{year}_{ijkt},$$

976

$$\mu_{ijkt}^S = \beta_0^S + \beta_{0i}^S + \beta_{0j}^S + \beta_{0k}^S + (\beta_1^S + \beta_{1k}^S) \text{year}_{ijkt},$$

977

$$\mu_{ijkt}^{S_n} = \beta_0^{S_n} + \beta_{0i}^{S_n} + \beta_{0j}^{S_n} + \beta_{0k}^{S_n} + (\beta_1^{S_n} + \beta_{1k}^{S_n}) \text{year}_{ijkt},$$

978

$$\mu_{ijkt}^{S_{PIE}} = \beta_0^{S_{PIE}} + \beta_{0i}^{S_{PIE}} + \beta_{0j}^{S_{PIE}} + \beta_{0k}^{S_{PIE}} + (\beta_1^{S_{PIE}} + \beta_{1k}^{S_{PIE}}) \text{year}_{ijkt},$$

979

$$[\beta_{0k}^N, \beta_{0k}^S, \beta_{0k}^{S_n}, \beta_{0k}^{S_{PIE}}, \beta_{1k}^N, \beta_{1k}^S, \beta_{1k}^{S_n}, \beta_{1k}^{S_{PIE}}]' \sim \text{MVNormal}(\mathbf{0}, \mathbf{SRS}),$$

980

$$\mathbf{S} = \begin{bmatrix} \sigma_{0k}^N & 0 & 0 & 0 & 0 & 0 & 0 & 0 \\ 0 & \sigma_{0k}^S & 0 & 0 & 0 & 0 & 0 & 0 \\ 0 & 0 & \sigma_{0k}^{S_n} & 0 & 0 & 0 & 0 & 0 \\ 0 & 0 & 0 & \sigma_{0k}^{S_{PIE}} & 0 & 0 & 0 & 0 \\ 0 & 0 & 0 & 0 & \sigma_{1k}^N & 0 & 0 & 0 \\ 0 & 0 & 0 & 0 & 0 & \sigma_{1k}^S & 0 & 0 \\ 0 & 0 & 0 & 0 & 0 & 0 & \sigma_{1k}^{S_n} & 0 \\ 0 & 0 & 0 & 0 & 0 & 0 & 0 & \sigma_{1k}^{S_{PIE}} \end{bmatrix},$$

981

$$\mathbf{R} = \begin{bmatrix} 1 & \rho_{N_{0k}S_{0k}} & \rho_{N_{0k}S_{n_{0k}}} & \rho_{N_{0k}S_{PIE_{0k}}} & \rho_{N_{0k}N_{1k}} & \rho_{N_{0k}S_{1k}} & \rho_{N_{0k}S_{n_{1k}}} & \rho_{N_{0k}S_{PIE_{1k}}} \\ \rho_{N_{0k}S_{0k}} & 1 & \rho_{S_{0k}S_{n_{0k}}} & \rho_{S_{0k}S_{PIE_{0k}}} & \rho_{S_{0k}N_{1k}} & \rho_{S_{0k}S_{1k}} & \rho_{S_{0k}S_{n_{1k}}} & \rho_{S_{0k}S_{PIE_{1k}}} \\ \rho_{N_{0k}S_{n_{0k}}} & \rho_{S_{0k}S_{n_{0k}}} & 1 & \rho_{S_{n_{0k}}S_{PIE_{0k}}} & \rho_{S_{n_{0k}}N_{1k}} & \rho_{S_{n_{0k}}S_{1k}} & \rho_{S_{n_{0k}}S_{n_{1k}}} & \rho_{S_{n_{0k}}S_{PIE_{1k}}} \\ \rho_{N_{0k}S_{PIE_{0k}}} & \rho_{S_{0k}S_{PIE_{0k}}} & \rho_{S_{n_{0k}}S_{PIE_{0k}}} & 1 & \rho_{S_{PIE_{0k}}N_{1k}} & \rho_{S_{PIE_{0k}}S_{1k}} & \rho_{S_{PIE_{0k}}S_{n_{1k}}} & \rho_{S_{PIE_{0k}}S_{PIE_{1k}}} \\ \rho_{N_{0k}N_{1k}} & \rho_{S_{0k}N_{1k}} & \rho_{S_{n_{0k}}N_{1k}} & \rho_{S_{PIE_{0k}}N_{1k}} & 1 & \rho_{N_{1k}S_{1k}} & \rho_{N_{1k}S_{n_{1k}}} & \rho_{N_{1k}S_{PIE_{1k}}} \\ \rho_{N_{0k}S_{1k}} & \rho_{S_{0k}S_{1k}} & \rho_{S_{n_{0k}}S_{1k}} & \rho_{S_{PIE_{0k}}S_{1k}} & \rho_{N_{1k}S_{1k}} & 1 & \rho_{S_{1k}S_{n_{1k}}} & \rho_{S_{1k}S_{PIE_{1k}}} \\ \rho_{N_{0k}S_{n_{1k}}} & \rho_{S_{0k}S_{n_{1k}}} & \rho_{S_{n_{0k}}S_{n_{1k}}} & \rho_{S_{PIE_{0k}}S_{n_{1k}}} & \rho_{N_{1k}S_{n_{1k}}} & \rho_{S_{1k}S_{n_{1k}}} & 1 & \rho_{S_{n_{1k}}S_{PIE_{1k}}} \\ \rho_{N_{0k}S_{PIE_{1k}}} & \rho_{S_{0k}S_{PIE_{1k}}} & \rho_{S_{n_{0k}}S_{PIE_{1k}}} & \rho_{S_{PIE_{0k}}S_{PIE_{1k}}} & \rho_{N_{1k}S_{PIE_{1k}}} & \rho_{S_{1k}S_{PIE_{1k}}} & \rho_{S_{n_{1k}}S_{PIE_{1k}}} & 1 \end{bmatrix},$$

982

$$\beta_0^N, \beta_0^S, \beta_0^{S_n}, \beta_0^{S_{PIE}} \sim N(0, 1),$$

983

$$\beta_1^N, \beta_1^S, \beta_1^{S_n}, \beta_1^{S_{PIE}} \sim N(0, 0.2),$$

984

$$\sigma_{0i}^S, \sigma_{0i}^{S_n}, \sigma_{0i}^{S_{PIE}}, \sigma_{1i}^S, \sigma_{1i}^{S_n}, \sigma_{1i}^{S_{PIE}}, \sigma_{0ij}^S, \sigma_{0ij}^{S_n}, \sigma_{0ij}^{S_{PIE}}, \sigma_{1ij}^S, \sigma_{1ij}^{S_n}, \sigma_{1ij}^{S_{PIE}} \sim \text{normal}(0, 1),$$

985

$$\sigma, \sigma_{0i}^N, \sigma_{1ij}^N, \sigma_{0ij}^N, \sigma_{1ij}^N \sim \text{student}(3, 0, 16),$$

986

$$\mathbf{R} \sim \text{LJK}(1),$$

987  
988 where  $N_{ijkt}$ ,  $S_{ijkt}$ ,  $S_{n_{ijkt}}$ , and  $S_{PIE_{ijkt}}$  are the values of each of the metrics in the  $k$ th study-  
989 treatment combination, for the  $j$ th study-block combination of the  $i$ th study in year  $t$ , and  $year_{ijkt}$   
990 is the time in years.  $\beta_0$  and  $\beta_1$  (with the respective superscripts for each metric) represent the  
991 non-varying intercepts and slopes, respectively.  $\beta_{0i}$  (with the respective superscripts for each  
992 metric) represent the varying intercepts study-level departures from  $\beta_0$ , and  $\beta_{0j}$  (with the  
993 respective superscripts for each metric) represent the varying intercepts study-block level  
994 departures from  $\beta_0$ .  $\beta_{0k}$  and  $\beta_{1k}$  (with the respective superscripts for each metric) represent the  
995 varying intercepts and slopes for study-treatment departures from  $\beta_0$  and  $\beta_1$ , respectively. The  
996 covariance matrix of the multivariate normal distribution for varying study-treatment effects  
997 were parameterised in terms of a correlation matrix  $\mathbf{R}$  and two matrices  $\mathbf{S}$  with diagonal elements  
998  $\sigma$  (superscripts for metrics, subscripts denote intercept (0), slopes (1) and study-treatment  
999 combination,  $k$ ).

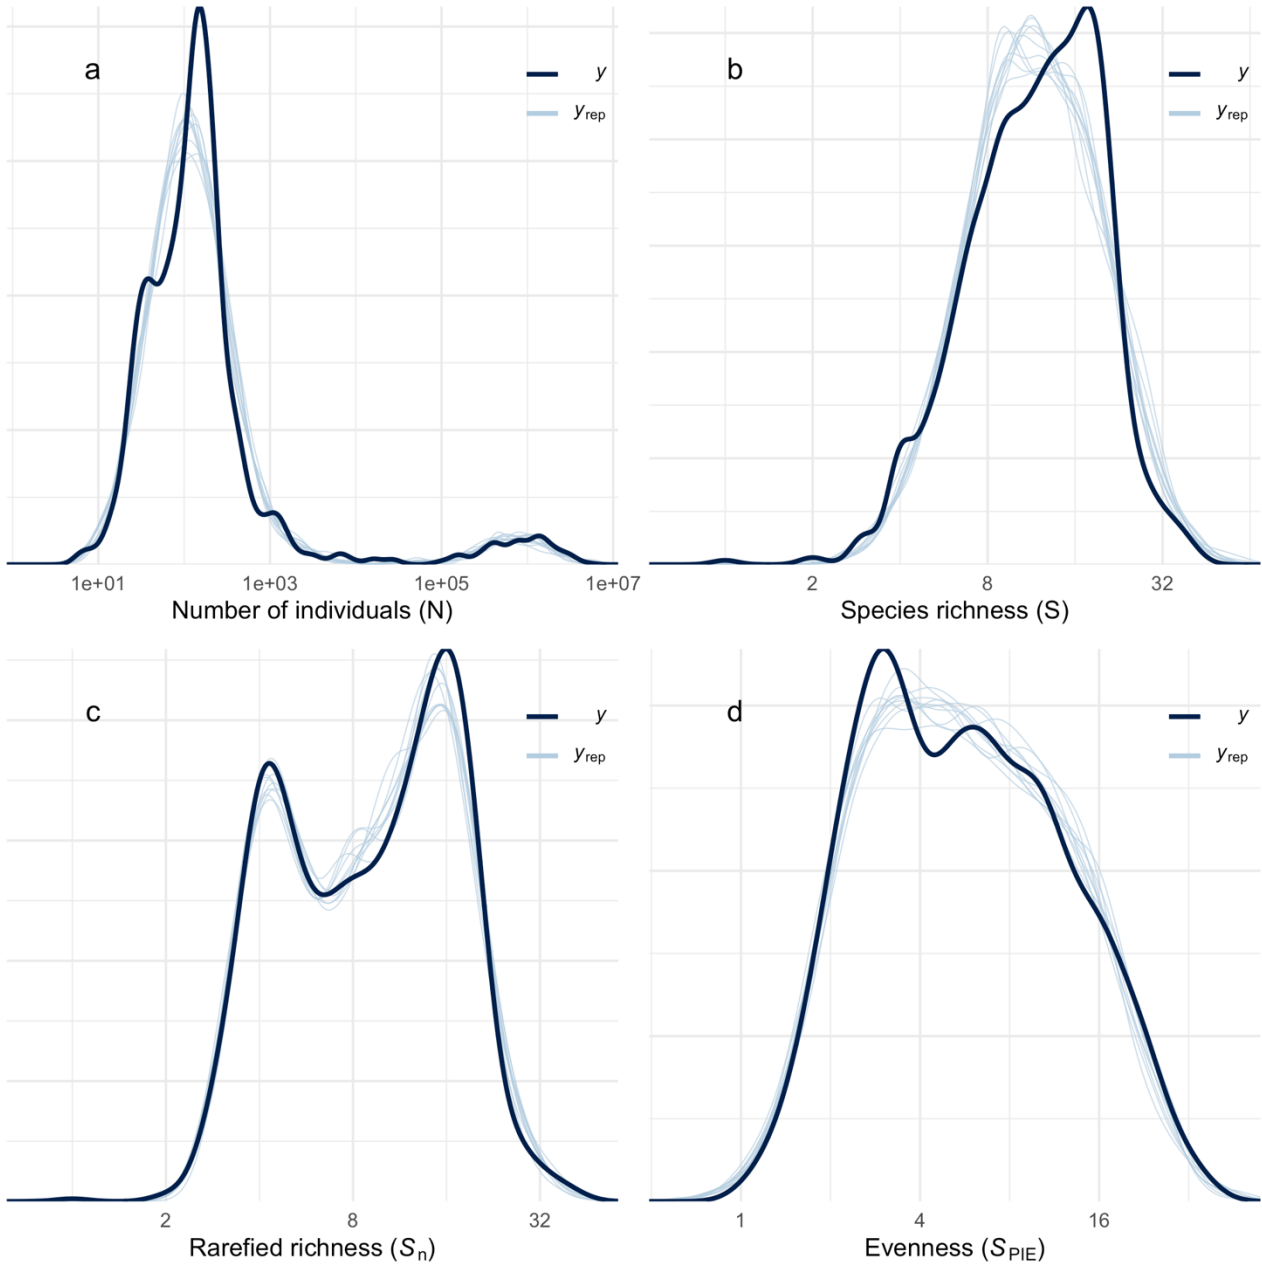

1000

1001 *Figure S2: Posterior predictive checks for the model fit to the temporal data in perturbed environments. (a) Total numbers of*  
 1002 *individuals, (b) species richness, (c) rarefied richness ( $S_n$ ) and (d) evenness ( $S_{PIE}$ ).). Each panel shows the density of the data*  
 1003 *( $y$ ) and ten draws of the posterior distribution ( $y_{rep}$ ).*

1004 **References** (for times series with experimental or natural perturbations)

- 1005 Bateman, H., D. Childers, and P. Warren. 2018. Point-count bird censusing: long-term  
 1006 monitoring of bird abundance and diversity along the Salt River in the greater Phoenix  
 1007 metropolitan area, ongoing since 2013 ver 3.  
 1008 Carpenter, S., J. Kitchell, J. Cole, and M. Pace. 2017. Cascade Project at North Temperate Lakes  
 1009 LTER Core Data Zooplankton 1984 - 2016 ver 4. Environmental Data Initiative.  
 1010 Carpenter, S., J. Kitchell, J. Cole, and M. Pace. 2017. Cascade Project at North Temperate Lakes  
 1011 LTER Core Data Phytoplankton 1984 - 2015 ver 4. Environmental Data Initiative.

- 1012 Ellison, A. and R. Dunn. 2018. Ants Under Climate Change at Harvard Forest and Duke Forest  
1013 2009-2015 ver 57. Environmental Data Initiative.
- 1014 Philip Grime and Jason Fridley. Point Quadrat Vegetation Data, Buxton Climate Change  
1015 Experiment, UK, 1994-2009. Knowledge Network for Biocomplexity.  
1016 doi:10.5063/AA/fridley.3.2.
- 1017 Hershey, A. 2016. Total numbers and species of insects taken from rock scrubbings during the  
1018 summer of 1984-1988, 1993-1994, 1996-1998, in the Kuparuk River experimental reach near  
1019 Toolik Field Station, North Slope Alaska.. ver 3. Environmental Data Initiative.
- 1020 Joern, A. 2020. CGR02 Sweep Sampling of Grasshoppers on Konza Prairie LTER watersheds  
1021 ver 14. Environmental Data Initiative.
- 1022 Joern, A. 2020. PBG07 Grasshopper species abundances in the Patch-Burn Grazing experiment  
1023 at Konza Prairie ver 5. Environmental Data Initiative.
- 1024 Knops, J. 2018. Arthropod sweep net sampling: Interactive Effects of Deer, Fire and Nitrogen  
1025 ver 8. Environmental Data Initiative.
- 1026 Knops, J. 2018. Small mammal abundance: Interactive Effects of Deer, Fire and Nitrogen ver 8.  
1027 Environmental Data Initiative.
- 1028 Santa Barbara Coastal LTER and D. Reed. 2020. SBC LTER: Reef: Long-term experiment: Kelp  
1029 removal: Fish abundance ver 18. Environmental Data Initiative.  
1030  
1031

1032 *Spatial comparisons: natural environmental variation*

1033

1034 We fit a model that assumed lognormal distributions for  $N$ ,  $S_n$ , and  $S_{PIE}$ , and a Poisson  
 1035 distribution (and log link function) for  $S$ . We fit the model with four chains and 4000 iterations,  
 1036 with 2000 as warmup. The model took the following form:

1037 
$$N_{ij} \sim \text{lognormal}(\mu_{ij}^N, \sigma^N),$$

1038 
$$S_{ij} \sim \text{poisson}(\lambda_{ij}^S),$$

1039 
$$S_{n_{ij}} \sim \text{lognormal}(\mu_{ij}^{S_n}, \sigma^{S_n}),$$

1040 
$$S_{PIE_{ij}} \sim \text{lognormal}(\mu_{ij}^{S_{PIE}}, \sigma^{S_{PIE}}), \text{ (S1.4)}$$

1041 
$$\mu_{ij}^N = \beta_0^N + \beta_{0j}^N + (\beta_{1j}^N) \text{site}_{ij},$$

1042 
$$\log(\lambda_{ij}^S) = \beta_0^S + \beta_{0i}^S + \beta_{0j}^S + (\beta_{1j}^S) \text{site}_{ij},$$

1043 
$$\mu_{ij}^{S_n} = \beta_0^{S_n} + \beta_{0j}^{S_n} + (\beta_{1j}^{S_n}) \text{site}_{ij},$$

1044 
$$\mu_{ij}^{S_{PIE}} = \beta_0^{S_{PIE}} + \beta_{0j}^{S_{PIE}} + (\beta_{1j}^{S_{PIE}}) \text{site}_{ij},$$

1045 
$$[\beta_{0j}^N, \beta_{0j}^S, \beta_{0j}^{S_n}, \beta_{0j}^{S_{PIE}}, \beta_{1j}^N, \beta_{1j}^S, \beta_{1j}^{S_n}, \beta_{1j}^{S_{PIE}}]' \sim \text{MVNormal}(\mathbf{0}, \mathbf{SRS}),$$

1046 
$$\mathbf{S} = \begin{bmatrix} \sigma_{0j}^N & 0 & 0 & 0 & 0 & 0 & 0 & 0 \\ 0 & \sigma_{0j}^S & 0 & 0 & 0 & 0 & 0 & 0 \\ 0 & 0 & \sigma_{0j}^{S_n} & 0 & 0 & 0 & 0 & 0 \\ 0 & 0 & 0 & \sigma_{0j}^{S_{PIE}} & 0 & 0 & 0 & 0 \\ 0 & 0 & 0 & 0 & \sigma_{1j}^N & 0 & 0 & 0 \\ 0 & 0 & 0 & 0 & 0 & \sigma_{1j}^S & 0 & 0 \\ 0 & 0 & 0 & 0 & 0 & 0 & \sigma_{1j}^{S_n} & 0 \\ 0 & 0 & 0 & 0 & 0 & 0 & 0 & \sigma_{1j}^{S_{PIE}} \end{bmatrix},$$

1047 
$$\mathbf{R} = \begin{bmatrix} 1 & \rho_{N_{0j}S_{0j}} & \rho_{N_{0j}S_{n_{0j}}} & \rho_{N_{0j}S_{PIE_{0j}}} & \rho_{N_{0j}N_{1j}} & \rho_{N_{0j}S_{1j}} & \rho_{N_{0j}S_{n_{1j}}} & \rho_{N_{0j}S_{PIE_{1j}}} \\ \rho_{N_{0j}S_{0j}} & 1 & \rho_{S_{0j}S_{n_{0j}}} & \rho_{S_{0j}S_{PIE_{0j}}} & \rho_{S_{0j}N_{1j}} & \rho_{S_{0j}S_{1j}} & \rho_{S_{0j}S_{n_{1j}}} & \rho_{S_{0j}S_{PIE_{1j}}} \\ \rho_{N_{0j}S_{n_{0j}}} & \rho_{S_{0j}S_{n_{0j}}} & 1 & \rho_{S_{n_{0j}}S_{PIE_{0j}}} & \rho_{S_{n_{0j}}N_{1j}} & \rho_{S_{n_{0j}}S_{1j}} & \rho_{S_{n_{0j}}S_{n_{1j}}} & \rho_{S_{n_{0j}}S_{PIE_{1j}}} \\ \rho_{N_{0j}S_{PIE_{0j}}} & \rho_{S_{0j}S_{PIE_{0j}}} & \rho_{S_{n_{0j}}S_{PIE_{0j}}} & 1 & \rho_{S_{PIE_{0j}}N_{1j}} & \rho_{S_{PIE_{0j}}S_{1j}} & \rho_{S_{PIE_{0j}}S_{n_{1j}}} & \rho_{S_{PIE_{0j}}S_{PIE_{1j}}} \\ \rho_{N_{0j}N_{1j}} & \rho_{S_{0j}N_{1j}} & \rho_{S_{n_{0j}}N_{1j}} & \rho_{S_{PIE_{0j}}N_{1j}} & 1 & \rho_{N_{1j}S_{1j}} & \rho_{N_{1j}S_{n_{1j}}} & \rho_{N_{1j}S_{PIE_{1j}}} \\ \rho_{N_{0j}S_{1j}} & \rho_{S_{0j}S_{1j}} & \rho_{S_{n_{0j}}S_{1j}} & \rho_{S_{PIE_{0j}}S_{1j}} & \rho_{N_{1j}S_{1j}} & 1 & \rho_{S_{1j}S_{n_{1j}}} & \rho_{S_{1j}S_{PIE_{1j}}} \\ \rho_{N_{0j}S_{n_{1j}}} & \rho_{S_{0j}S_{n_{1j}}} & \rho_{S_{n_{0j}}S_{n_{1j}}} & \rho_{S_{PIE_{0j}}S_{n_{1j}}} & \rho_{N_{1j}S_{n_{1j}}} & \rho_{S_{1j}S_{n_{1j}}} & 1 & \rho_{S_{n_{1j}}S_{PIE_{1j}}} \\ \rho_{N_{0j}S_{PIE_{1j}}} & \rho_{S_{0j}S_{PIE_{1j}}} & \rho_{S_{n_{0j}}S_{PIE_{1j}}} & \rho_{S_{PIE_{0j}}S_{PIE_{1j}}} & \rho_{N_{1j}S_{PIE_{1j}}} & \rho_{S_{1j}S_{PIE_{1j}}} & \rho_{S_{n_{1j}}S_{PIE_{1j}}} & 1 \end{bmatrix},$$

1048 
$$\beta_0^N, \beta_0^S, \beta_0^{S_n}, \beta_0^{S_{PIE}} \sim N(0, 1),$$

1049 
$$\sigma^N, \sigma^{S_n}, \sigma^{S_{PIE}}, \sigma_{0i}^S, \sigma_{0j}^N, \sigma_{0j}^S, \sigma_{0j}^{S_n}, \sigma_{0j}^{S_{PIE}}, \sigma_{1j}^N, \sigma_{1j}^S, \sigma_{1j}^{S_n}, \sigma_{1j}^{S_{PIE}} \sim \text{normal}(0, 1),$$

1050 
$$\mathbf{R} \sim \text{LJK}(1),$$

1051

1052 where  $N_{ij}$ ,  $S_{ij}$ ,  $S_{n_{ij}}$ , and  $S_{PIE_{ij}}$  are the values of each of the metrics for the  $i$ th observation in the  
 1053  $j$ th study-site combination, and  $\text{site}_{ij}$  is site identifier.  $\beta_0$  (with the respective superscripts for each  
 1054 metric) represent the non-varying intercepts for each data source (one each for CESTES and

1055 McGill), respectively.  $\beta_{0i}^S$  is an observation level varying intercept to model overdispersion in  $S$ .  
1056  $\beta_{0j}$  and  $\beta_{1j}$  (with the respective superscripts for each metric) represent the varying intercepts  
1057 (reference sites for each study) and slopes (departures for all other sites). The covariance matrix  
1058 of the multivariate normal distribution for varying study-site effects were parameterised in terms  
1059 of a correlation matrix  $\mathbf{R}$  and two matrices  $\mathbf{S}$  with diagonal elements  $\sigma$  (superscripts for metrics,  
1060 subscripts denote intercept (0), slopes (1)).  
1061

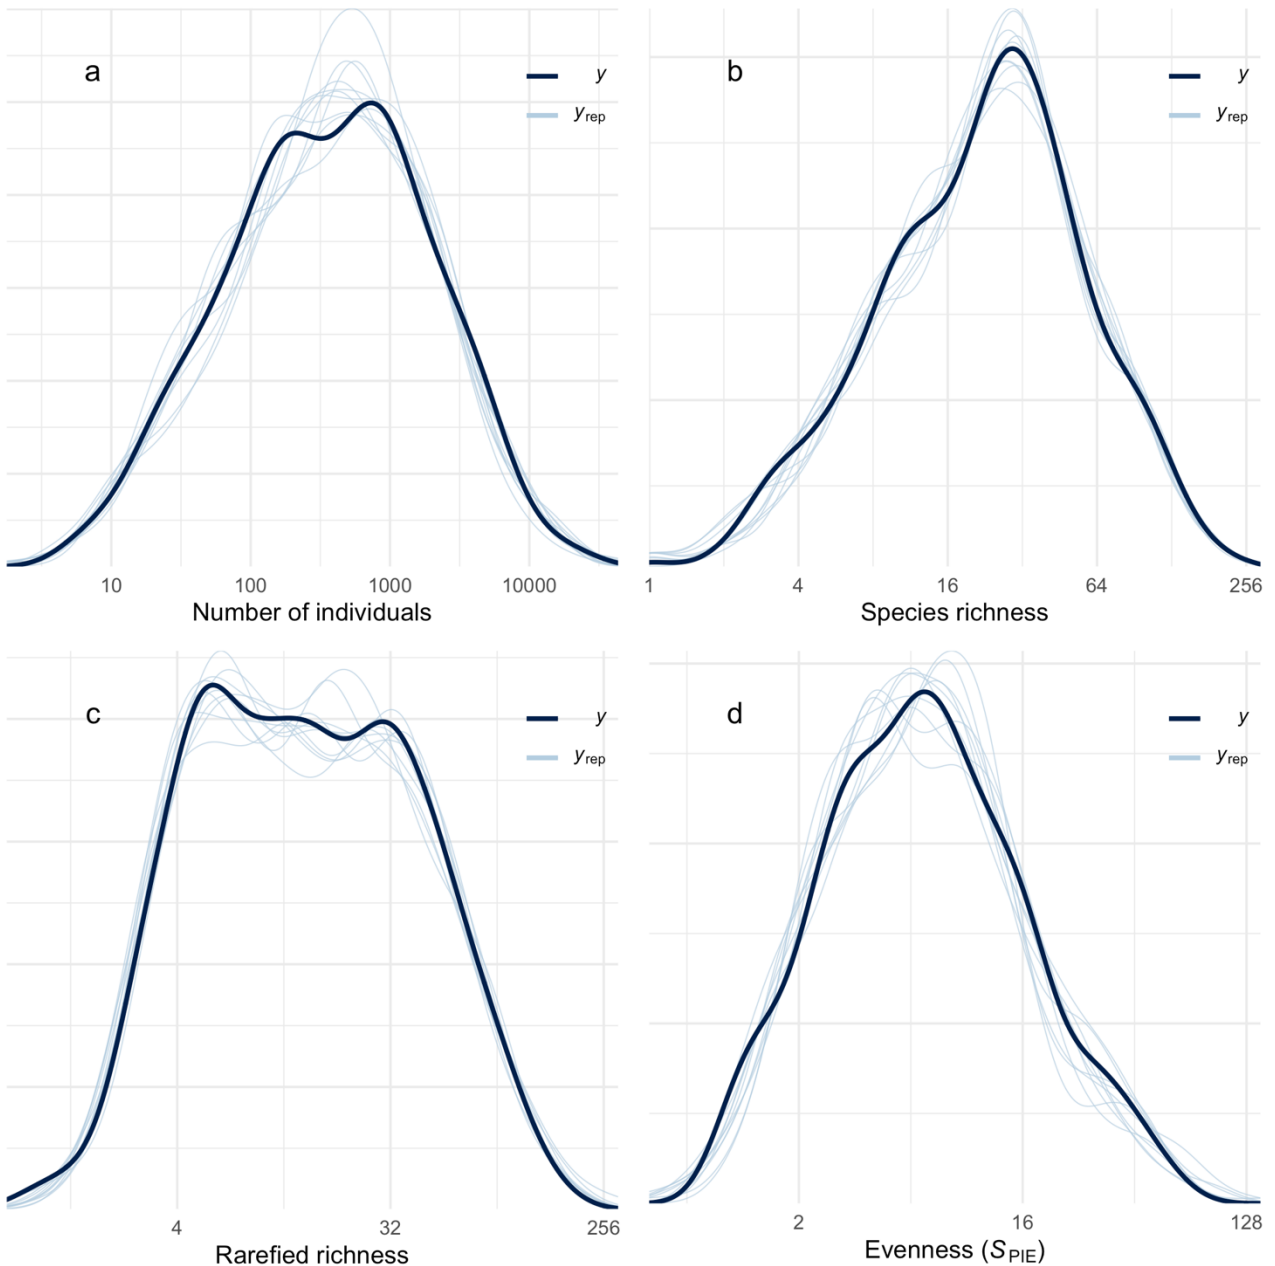

1062  
1063 *Figure S3: Posterior predictive checks for the model fit to the spatial data in natural environments. (a) Total numbers of*  
1064 *individuals, (b) species richness, (c) rarefied richness ( $S_n$ ) and (d) evenness ( $S_{PIE}$ ). Each panel shows the density of the data*  
1065 *( $y$ ) and ten draws of the posterior distribution ( $y_{rep}$ ).*

1066

1067 *Spatial comparisons: anthropogenic perturbations*

1068

1069 We fit a model that assumed lognormal distributions for  $N$ ,  $S_n$ , and  $S_{PIE}$ , and a Poisson  
 1070 distribution (and log link function) for  $S$ . We fit the model with four chains and 4000 iterations,  
 1071 with 2000 used as warmup. The model took the following form:

1072

1073

$$N_{ijk} \sim \text{lognormal}(\mu_{ijk}^N, \sigma^N),$$

1074

$$S_{ijk} \sim \text{poisson}(\lambda_{ijk}^S),$$

1075

$$S_{n_{ijk}} \sim \text{lognormal}(\mu_{ijk}^{S_n}, \sigma^{S_n}),$$

1076

$$S_{PIE_{ijk}} \sim \text{lognormal}(\mu_{ijk}^{S_{PIE}}, \sigma^{S_{PIE}}),$$

1077

$$\mu_{ijk}^N = \beta_0^N + \beta_j^N + \beta_{0k}^N + (\beta_1^N + \beta_{1k}^N)LU_{ij},$$

1078

$$\log(\lambda_{ijk}^S) = \beta_0^S + \beta_{0i}^S + \beta_{0j}^S + \beta_{0k}^S + (\beta_1^S + \beta_{1k}^S)LU_{ijk},$$

1079

$$\mu_{ijk}^{S_n} = \beta_0^{S_n} + \beta_j^{S_n} + \beta_{0k}^{S_n} + (\beta_1^{S_n} + \beta_{1k}^{S_n})LU_{ijk},$$

1080

$$\mu_{ijk}^{S_{PIE}} = \beta_0^{S_{PIE}} + \beta_j^{S_{PIE}} + \beta_{0k}^{S_{PIE}} + (\beta_1^{S_{PIE}} + \beta_{1k}^{S_{PIE}})LU_{ijk},$$

1081

$$[\beta_{0j}^N, \beta_{0j}^S, \beta_{0j}^{S_n}, \beta_{0j}^{S_{PIE}}, \beta_{1j}^N, \beta_{1j}^S, \beta_{1j}^{S_n}, \beta_{1j}^{S_{PIE}}]' \sim \text{MVNormal}(\mathbf{0}, \mathbf{SRS}),$$

1082

$$\mathbf{S} = \begin{bmatrix} \sigma_{0k}^N & 0 & 0 & 0 & 0 & 0 & 0 & 0 \\ 0 & \sigma_{0k}^S & 0 & 0 & 0 & 0 & 0 & 0 \\ 0 & 0 & \sigma_{0k}^{S_n} & 0 & 0 & 0 & 0 & 0 \\ 0 & 0 & 0 & \sigma_{0k}^{S_{PIE}} & 0 & 0 & 0 & 0 \\ 0 & 0 & 0 & 0 & \sigma_{1k}^N & 0 & 0 & 0 \\ 0 & 0 & 0 & 0 & 0 & \sigma_{1k}^S & 0 & 0 \\ 0 & 0 & 0 & 0 & 0 & 0 & \sigma_{1k}^{S_n} & 0 \\ 0 & 0 & 0 & 0 & 0 & 0 & 0 & \sigma_{1k}^{S_{PIE}} \end{bmatrix},$$

1083

$$\mathbf{R} = \begin{bmatrix} 1 & \rho_{N_{0k}S_{0k}} & \rho_{N_{0k}S_{n_{0k}}} & \rho_{N_{0k}S_{PIE_{0k}}} & \rho_{N_{0k}N_{1k}} & \rho_{N_{0k}S_{1k}} & \rho_{N_{0k}S_{n_{1k}}} & \rho_{N_{0k}S_{PIE_{1k}}} \\ \rho_{N_{0k}S_{0k}} & 1 & \rho_{S_{0k}S_{n_{0k}}} & \rho_{S_{0k}S_{PIE_{0k}}} & \rho_{S_{0k}N_{1k}} & \rho_{S_{0k}S_{1k}} & \rho_{S_{0k}S_{n_{1k}}} & \rho_{S_{0k}S_{PIE_{1k}}} \\ \rho_{N_{0k}S_{n_{0k}}} & \rho_{S_{0k}S_{n_{0k}}} & 1 & \rho_{S_{n_{0k}}S_{PIE_{0k}}} & \rho_{S_{n_{0k}}N_{1k}} & \rho_{S_{n_{0k}}S_{1k}} & \rho_{S_{n_{0k}}S_{n_{1k}}} & \rho_{S_{n_{0k}}S_{PIE_{1k}}} \\ \rho_{N_{0k}S_{PIE_{0k}}} & \rho_{S_{0k}S_{PIE_{0k}}} & \rho_{S_{n_{0k}}S_{PIE_{0k}}} & 1 & \rho_{S_{PIE_{0k}}N_{1k}} & \rho_{S_{PIE_{0k}}S_{1k}} & \rho_{S_{PIE_{0k}}S_{n_{1k}}} & \rho_{S_{PIE_{0k}}S_{PIE_{1k}}} \\ \rho_{N_{0k}N_{1k}} & \rho_{S_{0k}N_{1k}} & \rho_{S_{n_{0k}}N_{1k}} & \rho_{S_{PIE_{0k}}N_{1k}} & 1 & \rho_{N_{1k}S_{1k}} & \rho_{N_{1k}S_{n_{1k}}} & \rho_{N_{1k}S_{PIE_{1k}}} \\ \rho_{N_{0k}S_{1k}} & \rho_{S_{0k}S_{1k}} & \rho_{S_{n_{0k}}S_{1k}} & \rho_{S_{PIE_{0k}}S_{1k}} & \rho_{N_{1k}S_{1k}} & 1 & \rho_{S_{1k}S_{n_{1k}}} & \rho_{S_{1k}S_{PIE_{1k}}} \\ \rho_{N_{0k}S_{n_{1k}}} & \rho_{S_{0k}S_{n_{1k}}} & \rho_{S_{n_{0k}}S_{n_{1k}}} & \rho_{S_{PIE_{0k}}S_{n_{1k}}} & \rho_{N_{1k}S_{n_{1k}}} & \rho_{S_{1k}S_{n_{1k}}} & 1 & \rho_{S_{n_{1k}}S_{PIE_{1k}}} \\ \rho_{N_{0k}S_{PIE_{1k}}} & \rho_{S_{0k}S_{PIE_{1k}}} & \rho_{S_{n_{0k}}S_{PIE_{1k}}} & \rho_{S_{PIE_{0k}}S_{PIE_{1k}}} & \rho_{N_{1k}S_{PIE_{1k}}} & \rho_{S_{1k}S_{PIE_{1k}}} & \rho_{S_{n_{1k}}S_{PIE_{1k}}} & 1 \end{bmatrix},$$

1084

$$\beta_0^N, \beta_1^N \sim \text{student}(3, 5, 10),$$

1085

$$\beta_0^S, \beta_1^S \sim \text{student}(3, 3, 10),$$

1086

$$\beta_0^{S_n}, \beta_0^{S_{PIE}}, \beta_1^{S_n}, \beta_1^{S_{PIE}} \sim \text{student}(3, 2, 10),$$

1087

$$\sigma^N, \sigma^{S_n}, \sigma^{S_{PIE}}, \sigma_{0i}^S, \sigma_{0j}^N, \sigma_{0j}^S, \sigma_{0j}^{S_n}, \sigma_{0j}^{S_{PIE}}, \sigma_{0k}^N, \sigma_{0k}^S, \sigma_{0k}^{S_n}, \sigma_{0k}^{S_{PIE}}, \sigma_{1k}^N, \sigma_{1k}^S, \sigma_{1k}^{S_n}, \sigma_{1k}^{S_{PIE}} \sim \text{student}(3, 0, 10),$$

1088

$$\mathbf{R} \sim \text{LJK}(1),$$

1089



1090 where  $N_{ijk}$ ,  $S_{ijk}$ ,  $S_{n_{ijk}}$ , and  $S_{PIE_{ijk}}$  are the values of each of the metrics for the  $i$ th concatenation  
1091 of source ID, study number, block and site number (denoted SSBS in the database), in the  $j$ th  
1092 concatenation of source ID, study number, block (denoted SSB in the database), of the  $k$ th  
1093 combination of source ID and study (denoted SS in the database), and  $LU$  is an identifier for  
1094 land use types (other than primary vegetation, that was fit as the intercept).  $\beta_0$  (with the  
1095 respective superscripts for each metric) represent the non-varying intercepts for reference land  
1096 use category (i.e., primary vegetation).  $\beta_{0i}^S$  is a site-level varying intercept to model  
1097 overdispersion in  $S$ .  $\beta_{0j}$  (with the respective superscripts for each metric) is a varying intercept  
1098 for blocks.  $\beta_{0k}$  and  $\beta_{1k}$  (with the respective superscripts for each metric) represent the varying  
1099 intercepts (reference sites for each study) and slopes (departures for all other sites). The  
1100 covariance matrix of the multivariate normal distribution for varying study-site effects were  
1101 parameterised in terms of a correlation matrix  $\mathbf{R}$  and two matrices  $\mathbf{S}$  with diagonal elements  $\sigma$   
1102 (superscripts for metrics, subscripts denote intercept (0), slopes (1)).

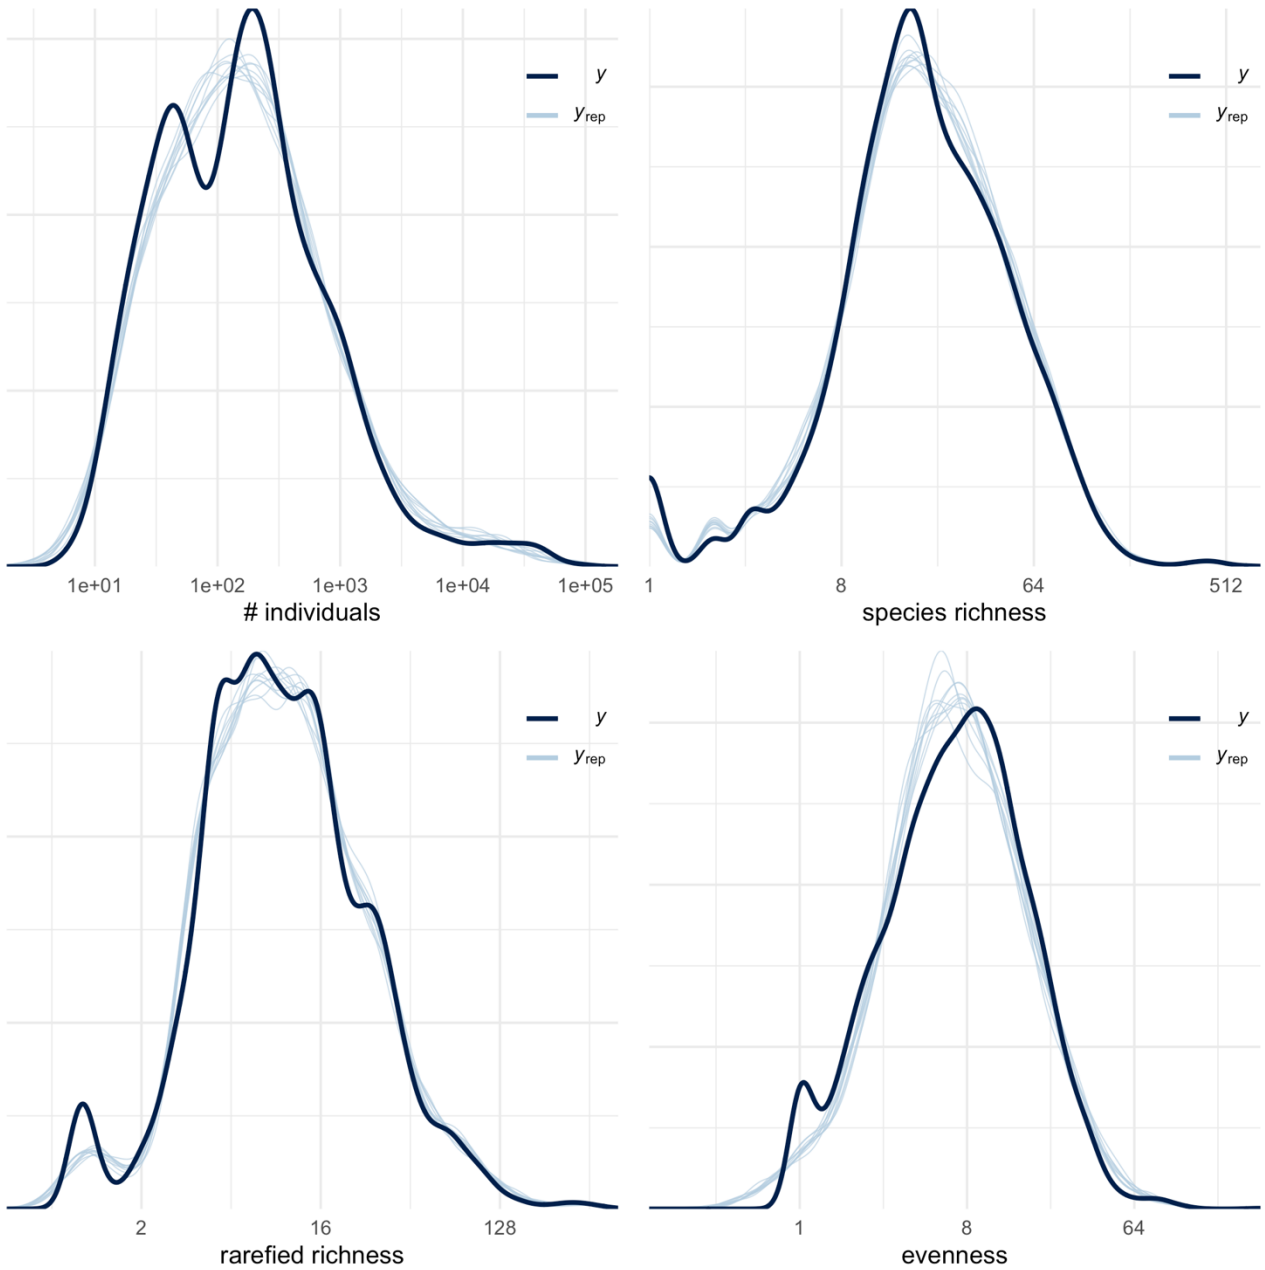

1103  
1104  
1105  
1106

Figure S4: Posterior predictive checks for the model fit to the spatial data in anthropogenically perturbed environments. (a) Total numbers of individuals, (b) species richness, (c) rarefied richness ( $S_n$ ) and (d) evenness ( $S_{PIE}$ ). Each panel shows the density of the data ( $y$ ) and ten draws of the posterior distribution ( $y_{rep}$ ).

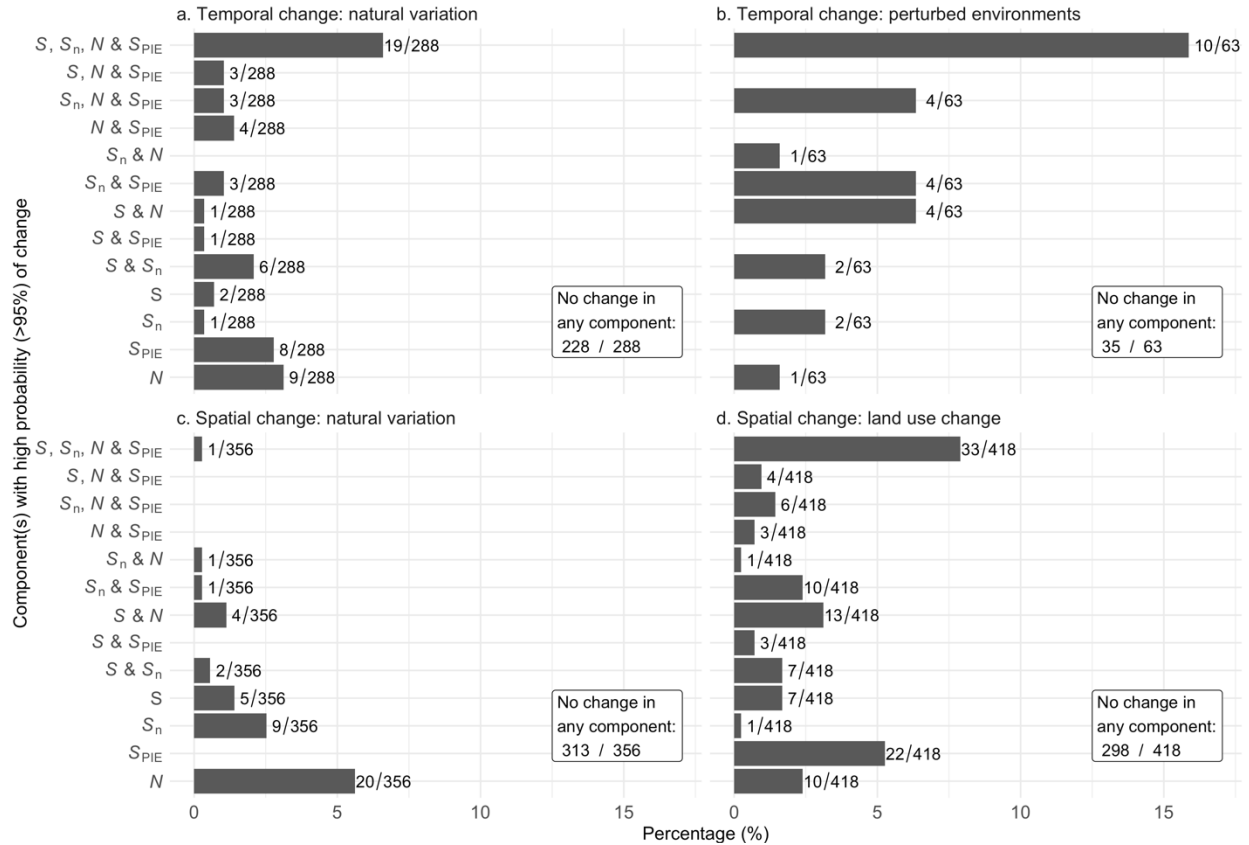

1107  
1108  
1109  
1110  
1111  
1112  
1113  
1114  
1115  
1116

**Figure S5:** Summary of assemblage diversity components with a high probability of change (90% credible interval did not overlap zero). (a) temporal changes in naturally varying environments, (b) temporal changes in perturbed environments, (c) spatial changes relative to an arbitrary reference, (d) spatial changes relative to primary vegetation. Assemblages with no component changes different from zero are reported as insets for clarity. Metric abbreviations: total number of individuals ( $N$ ), expected number of species for  $n$  individuals ( $S_n$ ), numbers equivalent transformation of the Probability of Interspecific Encounter ( $S_{PIE}$ ), and total species richness ( $S$ ). Number following each bar is the count of assemblages for that category.

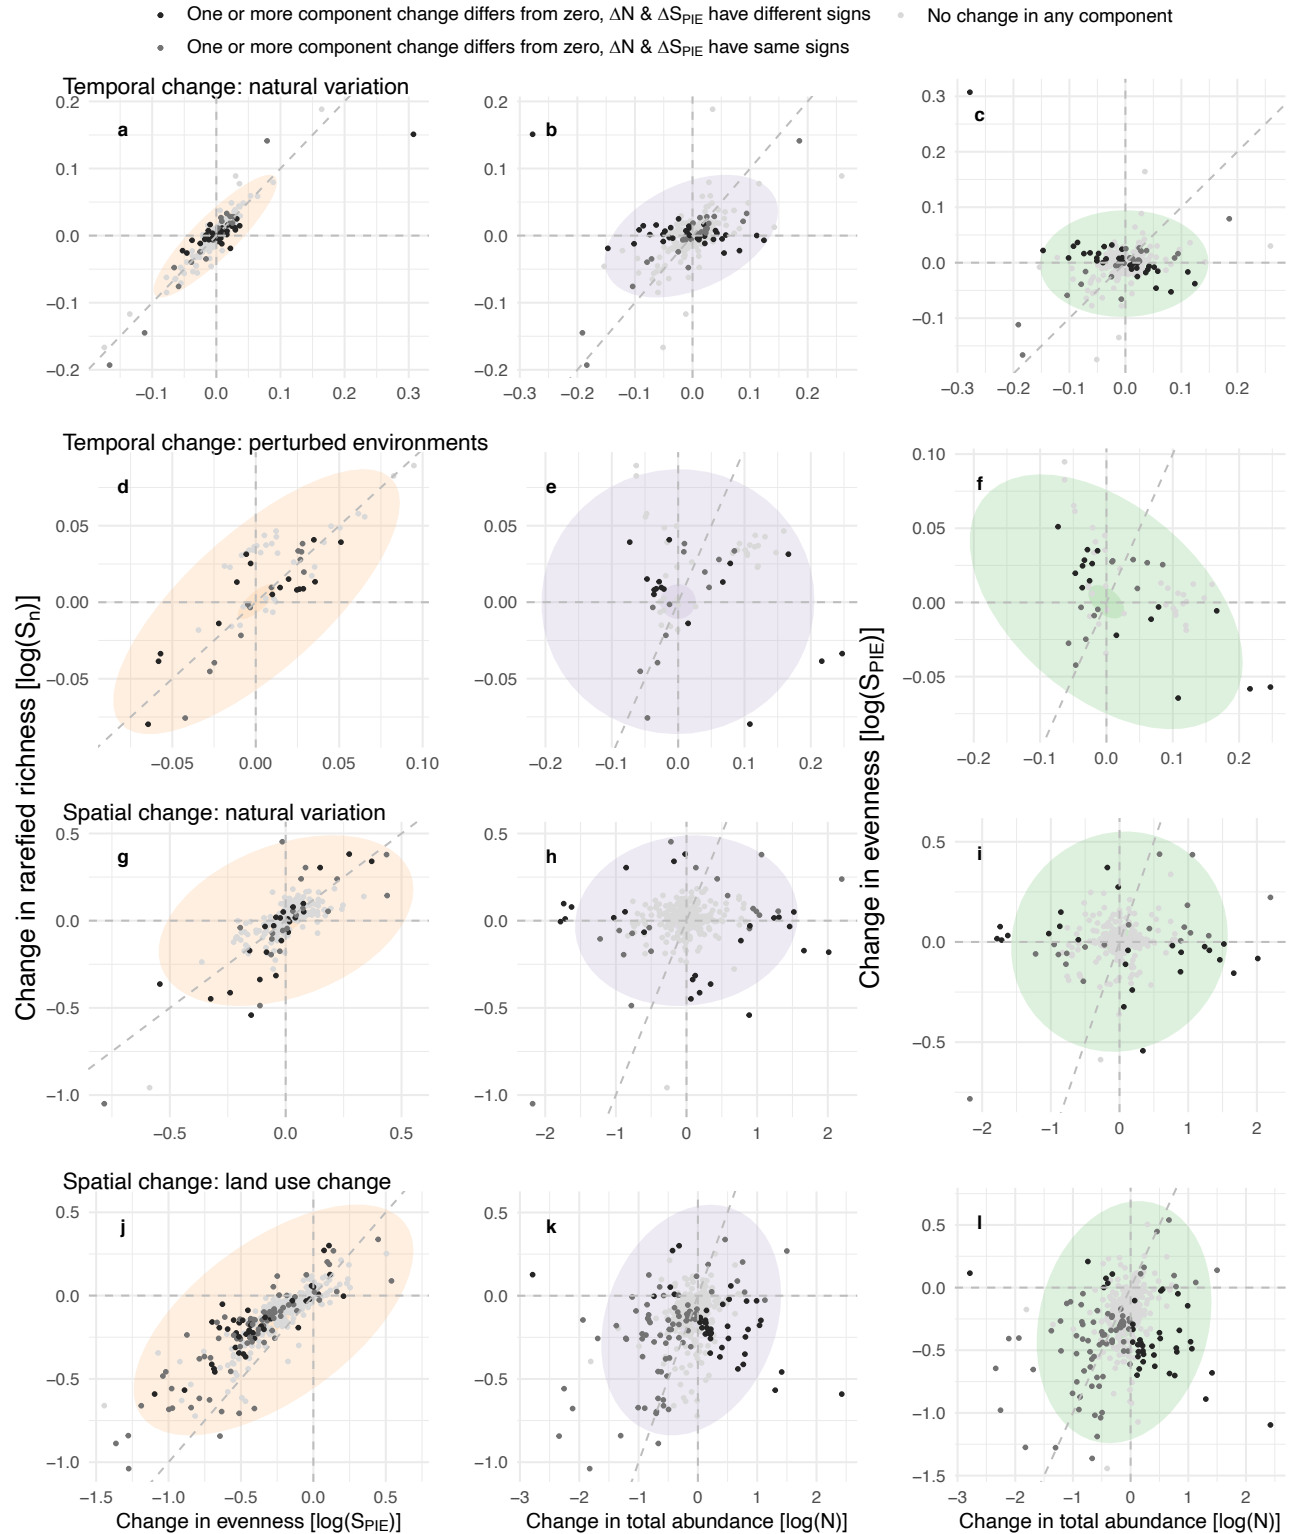

1117  
1118  
1119  
1120  
1121  
1122

**Figure S6:** Relationships between four components of local diversity change (not shown on Figure 3). Change in rarefied richness as a function of changes in evenness (left), change in rarefied richness as a function of changes in total abundance (middle) and evenness (right) for (a-c) study-level estimates of temporal changes in naturally varying environments; (d-f) estimates of temporal change for combinations of study and treatment in perturbed environments; (g-i) estimates of spatial changes within studies from an arbitrary reference site along natural

1123 environmental gradients; and, (d) estimates of spatial change within studies between primary vegetation and  
1124 different land use categories. Coloured concentration ellipses show 10% increments (5 – 95%) of the posterior  
1125 distributions. Dotted grey lines are  $x = y = 0$ , and  $x = y$  for visual reference. NB: Scale of x- and y-axes vary  
1126 between data sources; one estimate with  $\Delta N = -1.79$ ,  $\Delta S = -3.77$ ,  $\Delta S_n = -3.23$ ,  $\Delta SPIE = -3.21$ , removed from (j-l) for  
1127 clarity.  
1128  
1129
